# Supplementary material
Source: publisher figshare collection journal article supplement (https://rs.figshare.com/ndownloader/files/13164440)
Supplement: Supplementary file 1 [file 13164440]

CRYSTAL RIVER CREEK (CONTROL); HOMER & KEMP UNPUBL. MS.; MG/M2/DAY
No of Compartments	21
No of Living Compartments	20
		1	2	3	4	5	6	7	8	9	10	11	12	13	14	15	16	17	18	19	20	21
		MICROPHYTES	MACROPHYTES	ZOOPLANKTON	BENTHIC INVERTEBRATES	BLACKTIP SHARK	STINGRAY	STRIPED ANCHOVY	BAY ANCHOVY	NEEDLEFISH	SHEEPSHEAD KILLIFISH	GOLDSPOTTED KILLIFISH	GULF KILLIFISH	LONGNOSED KILLIFISH	SILVERSIDE	MOHARRA	SILVER JENNY	SHEEPSHEAD	PINFISH	MULLET	GULF FLOUNDER	DETRITUS	Exports	Respirations
1	MICROPHYTES			4.47E+01							4.40E-01	3.20E-01						1.60E-01		8.15E+00		4.04E+02		1.94E+02
2	MACROPHYTES																					4.16E+03	2.19E+02	2.32E+03
3	ZOOPLANKTON							9.00E-02	6.40E-01			2.20E-01			5.86E+00	3.20E+00	5.00E-02					7.32E+01	3.99E+01	3.13E+01
4	BENTHIC INVERTEBRATES							1.00E-02	1.00E+00	1.20E-01	1.50E-01	6.10E-01	2.68E+00	5.28E+00	8.59E+00	2.30E+00	6.00E-02	1.60E-01	5.30E-01			6.87E+02	4.28E+02	9.82E+02
5	BLACKTIP SHARK																					5.00E-01	1.21E+00	8.00E-01
6	STINGRAY																					1.50E-01	9.00E-02	4.60E-01
7	STRIPED ANCHOVY																					3.00E-02	1.00E-02	1.10E-01
8	BAY ANCHOVY									6.30E-01			5.00E-01						7.40E-01		2.00E-02	2.20E-01	7.40E-01	7.30E-01
9	NEEDLEFISH																		2.00E-02			3.20E-01	3.20E-01	8.90E-01
10	SHEEPSHEAD KILLIFISH						3.00E-02						1.00E-02						1.00E-02			6.50E-01	1.40E-01	5.40E-01
11	GOLDSPOTTED KILLIFISH						1.00E-02						9.00E-02						1.00E-01			6.80E-01	9.00E-02	8.90E-01
12	GULF KILLIFISH						7.00E-02															1.32E+00	1.50E+00	3.70E+00
13	LONGNOSED KILLIFISH									5.00E-02			3.00E-02									1.06E+00	1.27E+00	2.87E+00
14	SILVERSIDE						5.10E-01			6.20E-01			2.67E+00						5.60E-01		2.00E-02	3.38E+00	4.30E-01	7.23E+00
15	MOHARRA									2.00E-02			3.70E-01						1.00E-02		4.00E-02	1.53E+00	1.49E+00	2.94E+00
16	SILVER JENNY																					3.00E-02	4.00E-02	6.00E-02
17	SHEEPSHEAD																					1.10E-01	9.00E-02	1.20E-01
18	PINFISH									6.00E-02											3.00E-02	4.10E-01	3.80E-01	1.16E+00
19	MULLET					2.51E+00	8.00E-02			3.00E-02			8.00E-02									1.63E+01	2.41E+00	1.12E+01
20	GULF FLOUNDER																					2.00E-02	4.00E-02	5.00E-02
21	DETRITUS			1.10E+02	2.12E+03			5.00E-02	3.70E-01		7.90E-01	7.10E-01			9.70E-01	9.00E-01	2.00E-02			2.44E+01			5.68E+02	2.53E+03
22	Imports	6.52E+02	6.70E+03						1.57E+00	2.00E-02			1.60E-01						7.00E-02
23	Biomasses	3.32E+02	4.46E+05	2.61E+02	1.42E+04	1.07E+02	4.00E+01	4.00E+00	1.50E+01	4.60E+01	1.60E+01	2.70E+01	1.56E+02	1.21E+02	2.46E+02	8.20E+01	2.00E+00	1.30E+01	5.40E+01	8.64E+02	2.00E+00	6.95E+05
CRYSTAL RIVER CREEK (DELTA TEMP); HOMER & KEMP UNPBL. MS.; MG/M2/DAY
No of Compartments	21
No of Living Compartments	20
		1	2	3	4	5	6	7	8	9	10	11	12	13	14	15	16	17	18	19	20	21
		MICROPHYTES	MACROPHYTES	ZOOPLANKTON	BENTHIC INVERTEBRATES	STINGRAY	BAY ANCHOVY	CATFISH	NEEDLEFISH	SHEEPSHEAD KILLIFISH	GOLDSPOTTED KILLIFISH	GULF KILLIFISH	LONGNOSED KILLIFISH	MOLLY	SILVERSIDE	MOHARRA	PINFISH	SPOT	BLACK DRUM	RED DRUM	MULLET	DETRITUS	Exports	Respirations
1	MICROPHYTES			3.91E+01						1.20E-01	1.00E-01			3.50E-01							5.73E+00	3.19E+02	6.50E-01	1.65E+02
2	MACROPHYTES																					3.16E+03	1.66E+02	2.17E+03
3	ZOOPLANKTON						1.36E+01				7.00E-02				3.30E-01	4.00E-01						7.81E+01	3.24E+01	3.13E+01
4	BENTHIC INVERTEBRATES						2.10E+00	1.70E-01		4.00E-02	1.90E-01	1.71E+00	3.48E+00		4.90E-01	2.80E-01	9.00E-02	7.00E-02	1.78E+00	3.60E-01	1.72E+01	7.43E+02	3.36E+01	6.81E+02
5	STINGRAY																					1.00E-02		4.00E-02
6	BAY ANCHOVY					4.00E-02			2.40E-01			3.70E-01					2.30E-01					4.69E+00	7.50E-01	1.71E+01
7	CATFISH																					3.00E-02	2.00E-02	1.20E-01
8	NEEDLEFISH																					6.00E-02	1.00E-02	2.30E-01
9	SHEEPSHEAD KILLIFISH											1.00E-02										1.80E-01		1.90E-01
10	GOLDSPOTTED KILLIFISH											1.00E-02										2.10E-01	1.00E-01	2.60E-01
11	GULF KILLIFISH											1.00E-02										5.40E-01	7.30E-01	1.39E+00
12	LONGNOSED KILLIFISH											1.70E-01										7.00E-01	6.90E-01	1.92E+00
13	MOLLY																					1.80E-01	5.00E-02	1.20E-01
14	SILVERSIDE											3.30E-01										1.80E-01	5.00E-02	3.20E-01
15	MOHARRA																					1.60E-01	2.50E-01	3.80E-01
16	PINFISH																					7.00E-02	9.00E-02	1.80E-01
17	SPOT																					1.00E-02	2.00E-02	4.00E-02
18	BLACK DRUM																					3.60E-01	4.10E-01	1.01E+00
19	RED DRUM																					7.00E-02	7.00E-02	2.20E-01
20	MULLET					1.00E-02			6.00E-02			6.00E-02										1.15E+01	1.32E+00	1.00E+01
21	DETRITUS			1.17E+02	1.49E+03		7.74E+00			2.20E-01	2.20E-01				6.00E-02	1.10E-01							6.17E+02	2.09E+03
22	Imports	5.30E+02	5.49E+03														2.00E-02
23	Biomasses	3.35E+02	2.80E+05	2.61E+02	1.13E+04	4.00E+00	3.78E+02	9.60E+00	1.20E+01	6.80E+00	8.60E+00	6.00E+01	8.30E+01	4.70E+00	1.40E+01	1.40E+01	1.10E+01	1.00E+00	6.80E+01	1.56E+01	8.68E+02	4.62E+05
CHESAPEAKE BAY MESOHALINE NETWORK; D. BAIRD; UMCEES REF NO. XXX-86; MGC/M2/SU
No of Compartments	36
No of Living Compartments	33
		1	2	3	4	5	6	7	8	9	10	11	12	13	14	15	16	17	18	19	20	21	22	23	24	25	26	27	28	29	30	31	32	33	34	35	36
		PHYTOPLANKTON	BACTERIA IN SUSPENDED POC	BACTERIA IN SEDIMENT POC	BENTHIC DIATOMS	FREE BACTERIA	HETEROTROPHIC MICROFLAGEL	CILIATES	ZOOPLANKTON	CTENOPHORES	SEA NETTLE	OTHER SUSPENSION FEEDERS	MYA ARENARIA	OYSTERS	OTHER POLYCHAETES	NEREIS	MACOMA SPP	MEIOFAUNA	CRUSTACEAN DEPOSIT FEEDE	BLUE CRAB	FISH LARVAE	ALEWIFE & BLUE HERRING	BAY ANCHOVY	MENHADEN	SHAD	CROAKER	HOGCHOKER	SPOT	WHITE PERCH	CATFISH	BLUEFISH	WEAKFISH	SUMMER FLOUNDER	STRIPED BASS	DISSOLVED ORGANIC CARBON	SUSPENDED PARTICULATE ORG	SEDIMENT PARTICULATE ORGA	Exports	Respirations
1	PHYTOPLANKTON							3.37E+04	3.94E+04			4.46E+03	2.42E+03	4.69E+03									2.94E+02	2.21E+01											7.88E+04	1.19E+05			2.40E+05
2	BACTERIA IN SUSPENDED PO							1.44E+03	1.13E+03	1.24E+02		1.59E+02	7.10E+01	1.10E+02									1.33E+01	5.13E+00												4.18E+03	9.92E+03		1.54E+04
3	BACTERIA IN SEDIMENT POC														1.35E+05	2.10E+04	4.81E+04	3.02E+04	1.18E+04																		1.00E+05		2.77E+05
4	BENTHIC DIATOMS																	1.81E+04																			3.19E+04		2.78E+04
5	FREE BACTERIA						9.10E+04																													6.86E+03			8.42E+04
6	HETEROTROPHIC MICROFLAGE							3.25E+04																												1.28E+04			4.58E+04
7	CILIATES								7.85E+03	3.57E+03		3.01E+02	1.62E+02	3.16E+02																						4.00E+04			3.73E+04
8	ZOOPLANKTON									7.17E+03	1.21E+03										5.11E+00	2.68E+01	1.60E+03	2.59E+02	5.42E+00											2.29E+04		1.87E+04	4.06E+04
9	CTENOPHORES										5.73E+02																									6.39E+03	6.09E+02		6.70E+03
10	SEA NETTLE																																			4.65E+02	1.96E+02		1.12E+03
11	OTHER SUSPENSION FEEDERS																			5.56E+02																	3.57E+03		3.46E+03
12	MYA ARENARIA																			2.25E+02							9.43E+00										1.41E+03	5.33E+02	1.93E+03
13	OYSTERS																																				1.59E+03	3.13E+03	3.24E+03
14	OTHER POLYCHAETES																									6.00E+00	4.92E+01	2.62E+02	6.34E+01	1.27E+02							1.14E+05		1.99E+04
15	NEREIS																			2.94E+02						1.75E+00	1.17E+01	8.09E+01	4.92E+01	1.89E+01							1.92E+04		1.40E+03
16	MACOMA SPP																			3.78E+03								4.59E+01									1.98E+04		2.45E+04
17	MEIOFAUNA																																				2.69E+04		2.14E+04
18	CRUSTACEAN DEPOSIT FEEDE																			8.06E+02						2.50E-01	1.17E+01	1.67E+00		3.59E+01			7.51E-01				3.32E+03		7.63E+03
19	BLUE CRAB																			2.50E+02														2.05E+00			1.46E+03	1.33E+03	4.30E+03
20	FISH LARVAE																																				3.54E+00	9.38E-01	6.25E-01
21	ALEWIFE & BLUE HERRING																																	2.08E-01			1.38E+01	4.06E+00	8.75E+00
22	BAY ANCHOVY																											1.51E+01	1.52E+01		2.81E+00	9.52E+01	1.28E+01	1.79E+01			1.21E+03	9.62E+01	7.62E+02
23	MENHADEN																														2.70E+00		8.31E+00	1.10E+01			1.38E+02	7.68E+00	2.27E+02
24	SHAD																																				2.81E+00	9.38E-01	1.67E+00
25	CROAKER																																				4.09E+00	1.33E+00	2.59E+00
26	HOGCHOKER																																				4.30E+01	1.22E+01	2.68E+01
27	SPOT																														8.57E+00						2.12E+02	5.58E+01	1.29E+02
28	WHITE PERCH																																				6.73E+01	1.95E+01	4.10E+01
29	CATFISH																																				9.49E+01	2.85E+01	5.88E+01
30	BLUEFISH																																				6.82E+00	2.36E+00	4.91E+00
31	WEAKFISH																																4.48E+00				5.09E+01	8.34E+00	3.16E+01
32	SUMMER FLOUNDER																																				1.36E+01	4.24E+00	8.48E+00
33	STRIPED BASS																																				1.64E+01	4.62E+00	1.02E+01
34	DISSOLVED ORGANIC CARBON					1.82E+05
35	SUSPENDED PARTICULATE OR		3.26E+04					2.19E+04	4.41E+04	3.41E+03		2.67E+03	1.46E+03	2.86E+03									3.16E+02	1.09E+02													2.89E+05
36	SEDIMENT PARTICULATE ORG			6.24E+05																1.42E+03
37	Imports	5.23E+05			7.78E+04																														1.03E+05	1.85E+05
38	Biomasses	3.48E+03	7.90E+01	6.00E+02	1.77E+02	3.91E+02	3.90E+01	1.49E+02	1.98E+02	1.93E+01	1.75E+00	3.64E+02	1.10E+02	1.10E+03	1.19E+03	1.13E+02	1.89E+03	3.38E+02	2.28E+02	2.75E+02	1.00E-01	1.15E+00	7.28E+01	3.15E+01	4.50E-01	9.50E-01	9.00E+00	3.50E+01	2.55E+01	2.24E+01	2.25E+00	6.30E+00	4.43E+00	4.40E+00	2.19E+04	7.63E+03	3.05E+05
Chesapeake Mesohaline Ecosystem; Baird and Ulanowicz; mgC/m2/day
No of Compartments	15
No of Living Compartments	12
		1	2	3	4	5	6	7	8	9	10	11	12	13	14	15
		Pelagic Production	Benthic Production	Pelagic Bacteria	Microzooplankton	Invtbr Carnivores	Mesozooplankton	Benthic Susp Feeders	Meiofauna	Deposit Feeders	Benth Invtbr Carniv	Filter Feeding Fish	Carnivorous Fish	DOC Pool	Suspended POC	Sediment POC	Exports	Respirations
1	Pelagic Production				9.23E+01		1.08E+02	3.17E+01				8.66E-01		2.16E+02	3.27E+02			6.56E+02
2	Benthic Production								4.96E+01							8.74E+01		7.63E+01
3	Pelagic Bacteria				2.49E+02										1.88E+01			2.31E+02
4	Microzooplankton				8.89E+01	9.79E+00	2.15E+01	2.14E+00							1.45E+02			2.28E+02
5	Invtbr Carnivores					1.57E+00									1.88E+01	2.20E+00		2.14E+01
6	Mesozooplankton					2.29E+01						5.19E+00			6.28E+01		5.13E+01	1.11E+02
7	Benthic Susp Feeders										2.14E+00		2.58E-02			1.80E+01	1.01E+01	2.36E+01
8	Meiofauna															7.28E+01		5.80E+01
9	Deposit Feeders										1.32E+01		2.06E+00			4.22E+02		1.44E+02
10	Benth Invtbr Carniv										6.74E-01		5.52E-03			3.94E+00	3.58E+00	1.16E+01
11	Filter Feeding Fish												4.97E-01			3.73E+00	3.01E-01	2.74E+00
12	Carnivorous Fish												3.53E-02			1.38E+00	3.70E-01	8.48E-01
13	DOC Pool			4.99E+02
14	Suspended POC				6.40E+01	9.67E+00	1.24E+02	2.01E+01				1.22E+00			1.01E+02	8.18E+02		4.23E+01
15	Sediment POC								8.13E+01	5.81E+02	3.82E+00					1.95E+03	1.61E+01	7.47E+02
16	Imports	1.43E+03	2.13E+02											2.83E+02	5.07E+02
17	Biomasses	3.48E+03	1.77E+02	3.91E+02	1.88E+02	2.10E+01	1.98E+02	1.57E+03	3.34E+02	3.36E+03	2.71E+02	1.06E+02	1.09E+02	2.19E+04	7.71E+03	3.06E+05
AGGREGATED BALTIC ECOSYSTEM; F. WULFF; MG-C/M2/DAY
No of Compartments	15
No of Living Compartments	12
		1	2	3	4	5	6	7	8	9	10	11	12	13	14	15
		PELAGIC PRODUCTION	BENTHIC PRODUCTION	PELAGIC BACTERIA	MICROZOOPLANKTON	INVERTEBRATE CARNIVORES	MESOZOOPLANKTON	BENTH SUSPENSION FEEDER	MEIOFAUNA	DEPOSIT FEEDERS	BENT INVTBRT CARNIVORE	FILTER FEEDING FISH	CARNIVOROUS FISH	DOC POOL	SUSPENDED POC	SEDIMENT POC	Exports	Respirations
1	PELAGIC PRODUCTION				8.00E+01		1.42E+02	5.00E+01						7.12E+01	9.48E+01			1.32E+02
2	BENTHIC PRODUCTION															1.37E+01		4.11E+00
3	PELAGIC BACTERIA				8.62E+01													5.80E+01
4	MICROZOOPLANKTON						4.21E+01								4.21E+01			8.21E+01
5	INVERTEBRATE CARNIVORES											2.10E+00	3.55E-01		3.14E+00			5.55E+00
6	MESOZOOPLANKTON					1.11E+01						5.67E+00			1.50E+02			1.63E+02
7	BENTH SUSPENSION FEEDER										6.26E-01		1.57E+00			3.63E+01		3.08E+01
8	MEIOFAUNA									3.28E+00	5.08E-01					1.40E+01		1.02E+01
9	DEPOSIT FEEDERS									7.55E+00	1.00E+00	2.77E+00	5.55E-01			3.60E+01		2.51E+01
10	BENT INVTBRT CARNIVORE										3.59E-01		1.06E-01			6.18E-01		1.41E+00
11	FILTER FEEDING FISH												1.22E+00			4.01E+00	4.66E-01	4.84E+00
12	CARNIVOROUS FISH															1.17E+00	1.18E-02	2.63E+00
13	DOC POOL			7.68E+01
14	SUSPENDED POC			6.74E+01			1.45E+02	1.93E+01								6.44E+01		3.98E+00
15	SEDIMENT POC								2.80E+01	6.21E+01							4.96E+00	7.51E+01
16	Imports	5.70E+02	1.78E+01											5.60E+00	1.00E+01
17	Biomasses	1.07E+03	2.14E+01	2.10E+02	6.98E+01	5.47E+00	2.03E+02	3.45E+03	2.79E+02	1.82E+03	9.46E+01	5.85E+02	5.05E+02	2.66E+05	1.06E+04	6.09E+05
FLORIDA BAY TROPHIC EXCHANGE MATRIX; WET SEASON
No of Compartments	125
No of Living Compartments	122
		1	2	3	4	5	6	7	8	9	10	11	12	13	14	15	16	17	18	19	20	21	22	23	24	25	26	27	28	29	30	31	32	33	34	35	36	37	38	39	40	41	42	43	44	45	46	47	48
		2um Spherical Phytoplankt	Synedococcus	Oscillatoria	Small Diatoms (<20um)	Big Diatoms (>20um)	Dinoflagellates	Other Phytoplankton	Benthic Phytoplankton	Thalassia	Halodule	Syringodium	Roots	Drift Algae	Epiphytes	Free Bacteria	Water Flagellates	Water Cilitaes	Acartia Tonsa	Oithona nana	Paracalanus	Other Copepoda	Meroplankton	Other Zooplankton	Benthic Flagellates	Benthic Ciliates	Meiofauna	Sponges	Coral	Other Cnidaridae	Echinoderma	Bivalves	Detritivorous Gastropods	Epiphytic Gastropods	Predatory Gastropods	Detritivorous Polychaetes	Predatory Polychaetes	Suspension Feeding Polych	Macrobenthos	Benthic Crustaceans	Detritivorous Amphipods	Herbivorous Amphipods	Isopods	Herbivorous Shrimp	Predatory Shrimp	Pink Shrimp	Thor Floridanus	Lobster	Detritivorous Crabs
1	2um Spherical Phytoplank																2.34E+00	1.62E-01	1.51E-01	7.22E-01	1.30E-02	9.65E-01		3.35E-02				1.65E-02			3.49E-03	9.26E-02						5.56E-02
2	Synedococcus																3.31E+01	2.29E+00	2.13E+00	1.02E+01	1.84E-01	1.37E+01		7.46E+00				2.94E-01			3.92E-02	8.96E-01	1.41E-01			3.65E-01		5.19E-01	1.01E-01	7.36E-03	2.08E-02					9.39E-02			5.15E-03
3	Oscillatoria																		2.87E-03	1.37E-02	2.48E-04			1.00E-02							6.32E-05
4	Small Diatoms (<20um)																2.00E-01	1.38E-02	1.29E-02	6.16E-02	1.11E-03	8.24E-02		4.49E-02				1.77E-03	1.80E-03			9.05E-03						5.18E-03
5	Big Diatoms (>20um)																	2.09E-02	1.95E-02	9.34E-02	1.69E-03			6.82E-02				1.64E-03	2.73E-03			1.17E-01						5.94E-03								8.25E-02
6	Dinoflagellates																	2.43E-02	2.27E-02	1.09E-01	1.96E-03		2.93E-02	7.92E-02				2.91E-03				1.53E-02						8.74E-03
7	Other Phytoplankton																	5.83E-04	5.44E-04	2.61E-03	4.70E-05			1.71E-03				4.17E-05			1.13E-05	1.44E-04						8.38E-05
8	Benthic Phytoplankton																								2.90E+00	3.12E-01	1.21E+00				6.23E-03		1.12E-01			3.05E-01	1.89E-02		3.20E-01	4.39E-02	1.38E-01	1.50E-01		2.57E-01		1.49E-02			2.62E-02
9	Thalassia																																									8.11E-02	3.63E-01		7.43E-03	2.11E-01
10	Halodule																																									8.67E-03	4.12E-02		8.44E-04	2.39E-02
11	Syringodium																																									7.36E-03	2.97E-02		6.08E-04	1.72E-02
12	Roots
13	Drift Algae
14	Epiphytes																														6.12E-01			5.88E-02								1.58E-01	4.34E-01	2.07E+00	5.33E-02	1.09E-01	6.16E-02
15	Free Bacteria																2.60E+01	2.34E+00	7.83E-01	3.75E+00	6.77E-02	4.92E+00		2.71E+00				2.92E-02				2.50E-01
16	Water Flagellates																	8.31E+00	1.40E+00	6.72E+00	1.21E-01	9.30E+00		4.86E+00				3.06E-02				9.62E-02						1.50E-01
17	Water Cilitaes																		8.49E-02	4.07E-01	7.34E-03			2.94E-01				1.85E-03				5.82E-03						9.54E-03
18	Acartia Tonsa																						6.83E-02						2.05E-03	1.69E-03	2.94E-04															1.05E-02
19	Oithona nana																						3.20E-01						9.58E-03	1.80E-02	1.37E-03															4.90E-02
20	Paracalanus																						5.60E-03						1.67E-04	1.37E-04	2.39E-05															8.53E-04
21	Other Copepoda																						2.33E-01						6.98E-03	9.52E-05	1.00E-03															3.57E-02
22	Meroplankton																													5.98E-03
23	Other Zooplankton																						2.54E-01						7.20E-03	4.85E-03	9.29E-04							5.93E-04								3.68E-04
24	Benthic Flagellates																									9.16E+00	3.30E+01						4.77E-03			1.44E-03	1.74E-02	9.26E-03	4.70E-02	9.82E-02	2.78E-01
25	Benthic Ciliates																										3.72E+00						3.32E-04			5.37E-01	1.21E-03	7.34E-04	3.27E-03	6.84E-03	2.15E-02
26	Meiofauna																														2.68E-02		5.24E-03				7.62E-01		4.26E-01						1.82E-02	2.76E-01		5.21E-02	1.86E-02
27	Sponges																														1.48E-01
28	Coral
29	Other Cnidaridae																														6.32E-02
30	Echinoderma																																				4.54E-02											6.99E-03
31	Bivalves																														5.86E-02				1.37E-02		9.82E-02								6.28E-02
32	Detritivorous Gastropods																														3.73E-03				2.56E-02										3.62E-02			7.06E-03
33	Epiphytic Gastropods
34	Predatory Gastropods
35	Detritivorous Polychaete																																				1.39E-01								9.13E-02
36	Predatory Polychaetes																																												1.99E-01
37	Suspension Feeding Polyc																																				1.28E-01
38	Macrobenthos																																				7.59E-02									4.35E-03		8.22E-03
39	Benthic Crustaceans																													7.27E-04	8.47E-05						1.90E-02									5.51E-04		1.15E-03
40	Detritivorous Amphipods																													2.70E-02	6.99E-04						1.89E-02								1.60E-01			1.28E-02
41	Herbivorous Amphipods																													7.27E-03	9.41E-04						5.13E-02								3.03E-02			5.57E-03
42	Isopods																													1.60E-02	1.86E-03						7.43E-02											2.12E-02
43	Herbivorous Shrimp																													2.29E-02															1.88E-01
44	Predatory Shrimp																													1.13E-02
45	Pink Shrimp
46	Thor Floridanus																													2.22E-04
47	Lobster
48	Detritivorous Crabs
49	Omnivorous Crabs																																												2.47E-02
50	Predatory Crabs
51	Callinectus sapidus
52	Stone Crab
53	Sharks
54	Rays
55	Tarpon
56	Bonefish
57	Sardines
58	Anchovy
59	Bay Anchovy
60	Lizardfish
61	Catfish																																		6.87E-03
62	Eels
63	Toadfish
64	Brotalus
65	Halfbeaks
66	Needlefish
67	Other Killifish																													1.83E-05
68	Goldspotted killifish																													6.68E-04
69	Rainwater killifish
70	Snook
71	Sailfin Molly
72	Silverside																																		2.95E-03
73	Other Horsefish
74	Gulf Pipefish
75	Dwarf Seahorse
76	Grouper
77	Jacks
78	Pompano
79	Other Snapper
80	Gray Snapper
81	Mojarra
82	Grunt
83	Porgy
84	Pinfish
85	Scianids
86	Spotted Seatrout
87	Red Drum
88	Spadefish
89	Parrotfish
90	Mackerel
91	Mullet
92	Barracuda
93	Blennies																													5.62E-05
94	Code Goby
95	Clown Goby																													4.57E-05
96	Flatfish																																		1.97E-03
97	Filefishes
98	Puffer
99	Other Pelagic Fishes
100	Other Demersal Fishes
101	Loon
102	Greeb
103	Pelican
104	Comorant
105	Big Herons & Egrets
106	Small Herons & Egrets
107	Ibis
108	Roseate Spoonbill
109	Herbivorous Ducks
110	Omnivorous Ducks
111	Predatory Ducks
112	Raptors
113	Gruiformes
114	Small Shorebirds
115	Gulls & Terns
116	Kingfisher
117	Crocodiles
118	Loggerhead Turtle
119	Green Turtle
120	Hawksbill Turtle
121	Dolphin
122	Manatee
123	Water POC																2.21E+02	7.42E+00	1.20E-01	5.76E-01	1.04E-02	7.55E-01	6.15E-03	4.09E-01				8.91E-02				3.48E-01						1.81E-01
124	Benthic POC																								1.82E+02	1.09E+01	8.31E+01				1.31E-01		2.35E-01			1.20E+00	1.39E-01		3.90E-01	5.43E-02	1.71E-01	1.38E-01			2.75E-02	3.94E-01			2.39E-02
125	DOC															1.66E+02
126	Imports	5.22E+00	7.39E+01	8.59E-02	4.45E-01	6.14E-01	7.14E-01	1.54E-02	1.05E+01	2.80E+02	3.30E+01	2.00E+01	1.11E+02	7.40E+01	1.10E+02								5.47E-02
127	Biomasses	6.78E-02	9.60E-01	1.23E-03	5.79E-03	8.77E-03	1.02E-02	2.20E-04	1.53E-01	2.20E+01	2.50E+00	1.80E+00	1.00E+02	2.13E+00	1.50E+01	1.35E-01	1.48E-01	1.14E-02	6.59E-03	3.08E-02	5.37E-04	2.25E-02	3.61E-04	2.11E-02	2.30E-01	2.08E-02	7.70E-01	1.42E-01	3.69E-03	4.55E-03	2.67E-01	3.26E-01	2.08E-02	3.03E-03	2.58E-03	1.16E-01	1.04E-01	5.37E-02	2.69E-02	3.39E-03	2.58E-02	3.48E-02	6.88E-02	9.83E-02	4.86E-02	5.86E-02	2.16E-03	7.57E-03	3.27E-03
Everglades Graminoids Wet Season - Opossum corrected - gC/m2/y - 07/25/00
No of Compartments	66
No of Living Compartments	63
		1	2	3	4	5	6	7	8	9	10	11	12	13	14	15	16	17	18	19	20	21	22	23	24	25	26	27	28	29	30	31	32	33	34	35	36	37	38	39	40	41	42	43	44	45	46	47	48
		Living Sediments	Living POC	Periphyton	Macrophytes	Utricularia	Floating Veg	Apple snail	Freshwater Prawn	Crayfish	Mesoinverts	Other Macroinverts	Large Aquatic Insects	Terrestrial Inverts	Fishing spider	Gar	Shiners & Minnows	Chubsuckers	Catfish	Flagfish	Topminnows	Bluefin killifish	Killifishes	Mosquitofishes	Poecilids	Pigmy Sunfish	Bluespotted Sunfish	Warmouth	Dollar Sunfish	Redear Sunfish	Spotted sunfish	Other Centrarchids	Largemouth Bass	Cichlids	Other Large Fishes	Other Small Fishes	Salamanders	Salamander larvae	Large frogs	Medium frogs	Small frogs	Tadpoles	Turtles	Snakes	Lizards	Alligators	Muskrats	Rats&Mice	Rabbits
1	Living Sediments							3.35E-02	3.02E-02	5.43E-02	6.79E-01	1.87E-01	8.20E-02				1.00E-02	6.15E-02			8.25E-02	1.58E+00	1.57E-01	1.22E-01	1.07E-01	7.85E-03	2.92E-03	2.37E-02	1.29E-01	7.00E-02	3.23E-02	3.73E-03				4.77E-04						7.59E-05
2	Living POC								1.62E-03	1.74E-04	2.14E-03	6.82E-04	3.32E-03				3.41E-05	4.19E-04			6.71E-04	1.96E-01	1.92E-03	8.76E-04	5.14E-04	3.58E-05	2.36E-05	1.50E-04	1.04E-03	3.17E-04	3.13E-04	2.77E-05				2.35E-06						3.63E-07
3	Periphyton							6.22E-01	8.10E-01	3.98E-01	4.35E+00	2.79E+00					6.27E-03		2.42E-03	7.81E-01		8.41E-01		2.15E-01	2.28E-01											4.11E-04	5.43E-03	6.12E-04				2.82E-03	3.63E-02
4	Macrophytes							1.39E-02	3.30E-01	1.03E-01	4.67E-02	5.81E-02		6.88E-01																													1.45E-02				7.25E-01	2.00E-02	1.46E-02
5	Utricularia								3.57E-02	5.63E-02	3.36E-03	1.34E-03																															6.62E-03
6	Floating Veg								2.11E-02	4.80E-02	2.50E-03	1.97E-03																															1.68E-02				8.40E-01
7	Apple snail																		3.63E-03											3.17E-02					5.71E-05				1.14E-03	1.68E-03	4.52E-04		3.60E-03	1.27E-02		3.62E-04
8	Freshwater Prawn														4.94E-03	1.28E-03			1.37E-02									6.86E-02			6.51E-02	1.50E-03	4.11E-02	4.19E-02	2.42E-03				3.17E-03	4.67E-03	1.26E-03		1.00E-02	3.90E-02		1.01E-03
9	Crayfish															2.57E-04			4.66E-03									2.71E-02					6.12E-02	4.19E-02	1.69E-03		1.75E-02		1.22E-03	1.79E-03	4.82E-04		3.83E-03	1.01E-02		3.86E-04
10	Mesoinverts					7.18E-01			2.62E-02	3.27E-03		1.11E-02	4.81E-02				4.15E-03	3.28E-03	1.72E-02		5.17E-02	4.25E-02	3.78E-02	3.42E-02	6.13E-03	4.50E-03	1.22E-03	3.28E-02	4.91E-02	1.21E-01	3.00E-02	1.53E-03	9.71E-03	1.72E-02	7.27E-04	1.14E-04		6.12E-04	1.03E-02	1.52E-02	4.09E-03		3.25E-02	1.15E-01		3.27E-03
11	Other Macroinverts								1.78E-02	1.78E-03			3.83E-02			1.24E-04	2.26E-03	5.70E-03	2.38E-02		6.92E-02	4.32E-02	1.18E-01	3.34E-02		3.09E-03	1.63E-03	2.77E-02	5.57E-02	1.95E-01	4.58E-02	1.56E-03	2.05E-02	2.34E-02	8.57E-04	8.37E-05	5.43E-03			8.72E-03	2.35E-03		1.87E-02	6.62E-02		1.88E-03
12	Large Aquatic Insects														4.25E-04	1.71E-04	2.77E-04		1.16E-03		3.79E-03	3.00E-03	3.32E-03	2.40E-03		3.06E-04	8.95E-05	2.27E-03	3.51E-03	4.09E-03	2.24E-03	1.08E-04	7.73E-04	1.27E-03	5.08E-05	7.79E-06	8.72E-03			4.67E-04	1.26E-04		1.00E-03	3.54E-03		1.01E-04
13	Terrestrial Inverts														1.46E-02				2.94E-03					1.18E-02				8.90E-03	2.13E-02		1.96E-02	5.62E-04	9.55E-03				1.45E-02		1.44E-03	2.11E-03	5.69E-04		4.52E-03	1.60E-02	6.60E-02	4.55E-04		6.42E-03
14	Fishing spider																		1.90E-04														2.18E-04							8.34E-05	2.25E-05				7.19E-03	1.80E-05		2.54E-04
15	Gar																																													4.95E-06
16	Shiners & Minnows														9.85E-05	5.31E-06			4.38E-05									1.38E-04					9.91E-05	6.28E-05	1.14E-05				4.39E-05							1.39E-05
17	Chubsuckers																																													9.15E-05
18	Catfish																																													5.15E-05
19	Flagfish														2.83E-03	1.95E-03			1.07E-03									4.41E-03					9.61E-03	2.88E-03	3.55E-04				2.63E-03				4.34E-03	2.94E-02
20	Topminnows														2.00E-03	4.36E-05			1.56E-04									6.11E-04					1.18E-03	3.79E-04	4.95E-05				3.48E-04							1.10E-04
21	Bluefin killifish														3.40E-03	1.28E-03			4.19E-03									1.51E-02					2.29E-02	8.51E-03	1.24E-03				5.58E-03				9.21E-03	6.23E-02
22	Killifishes														5.89E-04	1.11E-04			1.83E-04									1.01E-03					3.40E-03	8.22E-04	7.95E-05				7.11E-04				1.17E-03	7.94E-03
23	Mosquitofishes														3.27E-03	8.79E-04			2.63E-04									9.79E-04					1.63E-03	5.71E-04	7.96E-05				7.72E-04				1.27E-03	8.62E-03
24	Poecilids														1.05E-03	2.80E-04			4.51E-04									1.50E-03					1.54E-03	7.44E-04	1.23E-04				9.59E-04				1.58E-03	1.07E-02
25	Pigmy Sunfish															2.04E-06																	6.53E-05						3.19E-05				5.26E-05	3.56E-04		1.01E-05
26	Bluespotted Sunfish															1.28E-06																	4.45E-05													3.74E-06
27	Warmouth															7.39E-04																														1.39E-04
28	Dollar Sunfish															1.51E-04																														1.68E-04
29	Redear Sunfish															1.68E-04																														2.74E-04
30	Spotted sunfish															2.55E-04																														1.26E-04
31	Other Centrarchids															5.21E-06																														6.23E-06
32	Largemouth Bass																																													1.18E-04
33	Cichlids															6.73E-05																														9.01E-05
34	Other Large Fishes																																													4.93E-06
35	Other Small Fishes															3.15E-07												6.59E-06					7.02E-06	3.31E-06	5.42E-07				3.01E-06				2.57E-05	3.37E-05
36	Salamanders																																				8.44E-03						1.77E-03	2.46E-03		6.98E-05
37	Salamander larvae
38	Large frogs																																											8.28E-04		2.35E-05
39	Medium frogs																		2.94E-05																					4.40E-03			1.77E-03	1.10E-03		3.13E-05
40	Small frogs																		1.23E-04																				1.02E-03				1.40E-03			7.48E-06
41	Tadpoles																																				3.00E-04						3.70E-04
42	Turtles																																											2.84E-03
43	Snakes																																										1.77E-03	1.41E-02		3.99E-04
44	Lizards																																											1.22E-01		3.47E-03
45	Alligators																																										3.53E-03			1.55E-05
46	Muskrats																																											2.86E-03		8.11E-05
47	Rats&Mice																																											4.18E-05
48	Rabbits																																													5.98E-07
49	Raccoons
50	Opossum
51	Otter
52	Mink
53	W-T Deer																																													2.90E-06
54	Bobcat
55	Panthers
56	Grebes																																													1.39E-08
57	Bitterns																																													4.52E-12
58	Ducks																																													1.17E-07
59	Snailkites
60	Nighthawks
61	Gruiformes
62	CSSsparrow																																															9.51E-08
63	Passerines																																															1.23E-06
64	Sediment Carbon	3.88E+02								2.41E-02	2.84E-01	1.22E-01		1.76E-02						5.22E-02		6.18E-02	6.65E-03	4.10E-03	2.71E-02											4.84E-05
65	Labile Detritus		1.86E+01					1.03E-02	9.36E-02	2.80E-02	4.57E-01	2.12E-01	1.23E-02	1.16E-01			3.22E-03	5.07E-02	3.49E-03	5.21E-01		5.09E-01	9.55E-02	3.54E-02	1.93E-01							7.23E-04				3.49E-04						2.90E-05
66	Refractory Detritus		8.76E+00							5.60E-03	6.88E-02	2.17E-02		7.81E-03			1.29E-04	2.02E-02	1.39E-04	2.08E-01		2.03E-02	3.82E-03	1.41E-03	7.71E-03							2.89E-05				1.39E-05						1.16E-04
67	Imports			2.83E+03	1.31E+03	6.00E+02	1.52E+03																																						3.51E+00
68	Biomasses	3.13E+00	1.50E-02	1.16E+02	1.28E+02	4.03E+01	8.95E+01	6.79E-02	1.36E-01	4.59E-02	1.72E-01	1.91E-01	1.23E-02	6.34E-02	2.51E-03	3.12E-03	2.62E-03	3.33E-02	1.91E-02	1.00E-01	1.35E-02	3.19E-01	2.61E-02	2.10E-02	2.97E-02	1.31E-03	5.11E-04	5.78E-02	6.04E-02	1.09E-01	3.40E-02	2.24E-03	6.45E-02	2.08E-02	1.78E-03	1.31E-04	2.42E-02	4.89E-04	1.18E-02	1.56E-02	3.74E-03	2.71E-03	6.23E-02	4.13E-02	2.25E-01	1.31E-03	2.21E-02	1.17E-04	3.06E-04
Mondego Estuary - Zostrea site. J. Patricio
No of Compartments	43
No of Living Compartments	42
		1	2	3	4	5	6	7	8	9	10	11	12	13	14	15	16	17	18	19	20	21	22	23	24	25	26	27	28	29	30	31	32	33	34	35	36	37	38	39	40	41	42	43
		Phytoplankton	Enteromorpha sp	Ulva lactuca	Zostera	Epiphytes	Gracilaria	Zooplankton	Hydrobia ulvae	Melita palmata	Ampithoe ferox	Gibulla	Littorina	Cyathura carinata	Scrobicularia plana	Cerastoderma edule	Modiolus	Amage adspersa	Capitella capitata	Heteromastus filifor	Oligochaeta	Other detrivors	Nephtys	Other predatory inve	Idotea chelipes	Sphaeroma hookeri	Nereis diversicolor	Carcinus maenas	Crangon crangon	Lumbrineris impatien	Diopatra neapolitana	Microalgae and detri	Zooplankton consumer	Endofauna consumers	Macrofauna predators	Trigla lucerna	Pomatoschistus minut	Larus ridibundus	Larus fuscus	Kentish Plover	Ringed Plover	Grey Plover	Dunlin	Detritus	Exports	Respirations
1	Phytoplankton							2.30E+01							4.40E+00	1.88E+01	3.30E-02															1.77E+00												1.42E+01		6.22E+01
2	Enteromorpha sp									3.93E-01	6.85E-01	6.32E-02	3.73E+00												7.60E-02			9.17E-01	2.30E-01															2.24E-02		6.10E+00
3	Ulva lactuca									3.54E-02	6.16E-02	1.26E-02	7.47E-01												3.80E-03			1.91E-01	1.98E-02															4.76E-02		1.12E+00
4	Zostera																								2.28E-01																			5.12E+02		5.12E+02
5	Epiphytes								1.78E+02	2.75E+00	4.79E+00	3.47E-01	2.05E+01												1.14E-01	9.50E-03																		1.18E+03		1.39E+03
6	Gracilaria																								1.90E-01			1.31E+00	6.74E-02															4.67E+01		4.82E+01
7	Zooplankton							2.55E+00																				1.05E-01	1.86E-01			1.77E+00	2.49E+00		1.64E-01	9.72E-03	2.24E-01							1.04E+01		7.66E+00
8	Hydrobia ulvae																							3.59E-01			9.82E+00	4.57E+00	7.93E-03	1.81E-03	5.66E-02			1.62E-02	1.52E-02	2.21E-03		1.30E-05		1.40E-04	6.00E-05	5.90E-05	7.70E-05	1.99E+02		1.42E+02
9	Melita palmata																						4.78E-03	3.04E-01				2.10E-01	1.67E-01	1.82E-03	6.29E-03				4.55E-02		8.31E-03			4.00E-06	1.30E-05	3.00E-05	3.00E-05	1.61E+00		1.57E+00
10	Ampithoe ferox																						7.17E-03	5.72E-01			2.43E-02	2.79E-01	3.17E-01	1.82E-03	6.29E-03				7.89E-02	1.00E-05	1.40E-02			6.00E-06	2.30E-05	5.10E-05	5.10E-05	2.81E+00		2.74E+00
11	Gibulla																							6.09E-03			2.49E-02	3.49E-02	3.97E-03	2.18E-02				5.57E-04		3.00E-06								2.87E-01		2.53E-01
12	Littorina																							6.09E-02			4.37E-01	1.05E-01	3.97E-03	3.63E-03				1.86E-03		1.00E-04								1.43E+01		2.24E+01
13	Cyathura carinata																							6.09E-02					1.98E-02	1.56E-02					1.52E-02	1.40E-04								2.29E-01		2.27E-01
14	Scrobicularia plana																						2.39E-02	3.59E-01			5.82E-01	3.49E+00	3.17E-01	5.46E-02	6.29E-03			4.09E-03	5.46E-02	8.40E-04		4.61E-04	1.40E-05	1.40E-05	1.20E-05	2.40E-05	3.00E-06	1.27E+01		1.17E+01
15	Cerastoderma edule																						6.22E-02	4.99E-01			9.22E-01	5.55E+00	4.92E-01	2.18E-02	6.29E-03			9.85E-03	9.10E-02	1.42E-03		3.00E-05	9.00E-06	2.30E-05	2.40E-05		1.00E-06	6.75E+01		5.01E+01
16	Modiolus																						1.20E-03				9.70E-03		3.97E-03	1.56E-03				1.86E-04	3.03E-03									1.12E-01		8.80E-02
17	Amage adspersa																						1.20E-03	2.43E-03					3.97E-03					5.57E-04						3.00E-06				4.70E-02		3.68E-02
18	Capitella capitata																						4.78E-04					6.98E-03	7.93E-04	3.12E-03				3.72E-04				3.00E-05						3.14E-02		2.88E-02
19	Heteromastus filifor																						1.82E-01	8.22E-01	1.52E-03		9.70E-02	1.75E-01	2.78E-02	1.56E-03				2.60E-02	3.03E-02					2.00E-06	8.00E-06	7.00E-06	6.00E-06	3.03E+00		2.93E+00
20	Oligochaeta																							1.83E-01	1.52E-03		2.43E-02	6.98E-02	2.78E-02	7.80E-03				1.86E-04							1.20E-05			6.80E-01		6.62E-01
21	Other detrivors																						2.24E-01	7.91E-01	1.52E-03		1.70E-01	3.14E-01	3.97E-02	1.56E-03	4.40E-02			3.35E-02	9.10E-02					6.00E-06	1.30E-05	1.20E-05	1.10E-05	3.51E+00		3.48E+00
22	Nephtys																						5.98E-03	1.83E-02				1.75E-01	7.93E-03					7.43E-04	1.52E-02					1.00E-06	1.00E-06	1.00E-06	1.00E-06	2.56E-01		7.18E-01
23	Other predatory inve																						1.87E-01	5.78E-01	2.28E-03			1.75E-01	2.38E-02	1.56E-03				1.86E-02	3.03E-02					2.00E-06	1.20E-05	5.00E-06	5.00E-06	1.42E+00		3.65E+00
24	Idotea chelipes																							6.09E-02	8.36E-03				4.36E-02	1.56E-03					3.03E-02	1.40E-04						1.00E-06		1.59E-01		4.56E-01
25	Sphaeroma hookeri																							6.09E-03											3.03E-03									9.88E-03		2.85E-02
26	Nereis diversicolor																						5.02E-02	2.13E-01				3.49E+00	7.22E-01					3.35E-02	9.40E-02		2.23E-03	2.50E-05		2.00E-05	5.90E-05	3.20E-05	3.70E-05	5.09E+00		1.45E+01
27	Carcinus maenas																											1.64E+00	1.55E-01					6.32E-03	8.31E-01	4.26E-02	6.23E-04	6.00E-06	9.40E-05	1.60E-05		1.40E-05	1.50E-05	1.13E+01		2.09E+01
28	Crangon crangon																											3.49E-01	7.93E-03					2.23E-02	3.03E-01	6.11E-02	9.86E-03	6.00E-06						8.33E-01		2.38E+00
29	Lumbrineris impatien																						4.78E-03	1.22E-01				6.98E-02	1.59E-02					7.80E-03	9.10E-03					1.00E-06	2.00E-06	2.00E-06	1.00E-06	3.95E-01		9.36E-01
30	Diopatra neapolitana																						5.98E-03	4.87E-02				3.49E-02	1.59E-02					3.72E-04	9.10E-03					1.00E-06		2.00E-06	2.00E-06	1.37E-01		3.77E-01
31	Microalgae and detri																											3.49E-01	1.98E-02						2.49E-01			3.00E-06						3.78E+00		1.33E+01
32	Zooplankton consumer																											1.75E-01	4.76E-02						1.82E-01	9.80E-03		3.00E-06						5.21E-01		1.56E+00
33	Endofauna consumers																											3.49E-02							3.03E-03									4.73E-02		1.01E-01
34	Macrofauna predators																																		5.76E-02	1.26E-03								7.17E-01		2.26E+00
35	Trigla lucerna																																		6.07E-03	1.34E-03								4.86E-02		8.40E-02
36	Pomatoschistus minut																											1.40E-02						1.67E-03	2.43E-02	9.38E-03								5.45E-02		1.56E-01
37	Larus ridibundus																																											4.08E-04		1.03E-03
38	Larus fuscus																																											3.40E-04		8.60E-04
39	Kentish Plover																																											6.80E-05		1.72E-04
40	Ringed Plover																																											6.80E-05		1.72E-04
41	Grey Plover																																											6.80E-05		1.72E-04
42	Dunlin																																											6.80E-05		1.72E-04
43	Detritus								1.78E+02	7.51E-01	1.31E+00	2.09E-01	1.23E+01	5.68E-01	2.49E+01	1.07E+02	1.87E-01	9.20E-02	7.20E-02	7.32E+00	1.66E+00	8.70E+00	4.36E-01	1.02E+00	1.33E-01	3.80E-02	1.21E+01	1.10E+01	9.72E-01	1.42E+00	5.03E-01	1.42E+01		1.49E-03	1.58E-01				4.00E-06						1.71E+03
44	Imports	1.24E+02	1.22E+01	2.24E+00	1.02E+03	2.77E+03	9.65E+01																												4.40E-01			8.64E-04	1.08E-03
45	Biomasses	3.36E-01	1.80E+00	3.73E-01	2.05E+02	7.70E+00	1.61E+01	3.48E-01	5.48E+01	1.09E-01	2.36E-01	7.18E-02	2.49E+00	5.60E-02	3.26E+00	5.22E+00	2.20E-02	8.00E-03	6.00E-03	6.10E-01	1.27E-01	6.00E-01	5.20E-02	3.55E-01	4.00E-02	2.50E-03	8.66E-01	1.09E+00	1.32E-01	1.30E-01	1.93E-02	1.69E+00	3.35E-01	6.00E-02	3.14E-01	2.00E-02	3.05E-02	6.00E-03	5.00E-03	1.00E-03	1.00E-03	1.00E-03	1.00E-03	5.27E+02
FINAL NARRAGANSETT BAY MODEL AUG 1994; (mgC/m2/year)
No of Compartments	32
No of Living Compartments	31
		1	2	3	4	5	6	7	8	9	10	11	12	13	14	15	16	17	18	19	20	21	22	23	24	25	26	27	28	29	30	31	32
		Bluefish	Striped Bass	Winter Flounder	Windowpane	Scup	Tautog	Dogfish	Skates	Longfin Squid	Butterfish	Menhaden	Bay Anchovy	Atl Silversides	Mummichog	Hard Clam	Cancer Crabs	Am Lobster	Softshell Clam	Ben Macrofauna	Ben Meiofauna	Shrimp(Pal Crg)	Ctenophores	Fish Larvae	Mesozooplankton	Microzooplankto	Hetero Microflag	Pelag Bacteria	SusPoc Bacteria	SedPOC Bacteria	Benthic Alage	Phytoplankton	Detritus	Exports	Respirations
1	Bluefish																																3.05E+02	4.20E+01	3.21E+02
2	Striped Bass	2.01E+01						1.09E+01																									5.73E+01	4.20E+01	9.81E+01
3	Winter Flounder		6.85E+00					1.09E+01																									1.20E+02	6.60E+01	3.92E+02
4	Windowpane							1.09E+01																									3.40E+01	3.77E+00	1.06E+02
5	Scup		9.14E+00																														1.71E+02	1.16E+02	5.04E+02
6	Tautog	6.01E+01	1.14E+01					6.55E+00																									1.97E+02	3.94E+00	4.76E+02
7	Dogfish																																5.41E+01	5.10E-01	1.64E+02
8	Skates							1.09E+01																									1.77E+02	6.66E+00	4.55E+02
9	Longfin Squid	4.68E+01						1.09E+01		1.56E+01																							6.44E+01	8.36E+00	1.66E+02
10	Butterfish	1.67E+02	5.71E+01					4.37E+01		7.19E+01																							3.88E+02	8.68E+00	3.68E+02
11	Menhaden	2.34E+02	2.28E+01							1.56E+01																							1.81E+02	1.10E+01	4.06E+02
12	Bay Anchovy	3.34E+01	2.74E+01							1.56E+01																							5.16E+01	3.00E-03	1.12E+02
13	Atl Silversides	3.34E+01	1.14E+01							2.19E+01							1.38E+02	4.32E+01															2.94E+02	1.47E+01	8.75E+02
14	Mummichog	4.01E+01	2.06E+01	5.96E+01				4.37E+00									1.38E+02	4.32E+01															4.80E+02	1.47E+01	1.20E+03
15	Hard Clam		2.28E+01	1.19E+01																													1.39E+03	6.16E+01	2.95E+03
16	Cancer Crabs	3.34E+01	2.28E+01	1.79E+01		8.00E+01		2.18E+01	6.50E+01									1.73E+02															5.67E+02	1.52E+00	1.77E+03
17	Am Lobster						1.13E+02																										2.10E+02	7.00E+01	4.70E+02
18	Softshell Clam																1.38E+02	4.32E+01															6.98E+02	1.56E-01	1.07E+03
19	Ben Macrofauna		1.60E+01	3.58E+02	2.02E+01	4.80E+02	4.53E+02	2.18E+01	3.90E+02						4.00E+02		6.88E+02	3.02E+02															1.74E+04		1.52E+04
20	Ben Meiofauna				9.30E+00	8.00E+01											5.50E+02			3.57E+03		4.20E+03											1.28E+04		3.58E+04
21	Shrimp(Pal Crg)			1.49E+02	1.26E+02	1.60E+02	1.89E+02	2.18E+01	1.95E+02	1.72E+02	6.07E+02				4.00E+02		5.50E+02	2.59E+02		3.57E+03													1.60E+04		1.96E+04
22	Ctenophores							4.37E+01			2.21E+02																						1.41E+03	2.43E+01	1.48E+03
23	Fish Larvae																						3.18E+02										1.59E+02	3.84E+00	1.37E+02
24	Mesozooplankton										1.66E+02		2.16E+02	1.29E+03	8.00E+02	4.44E+02				7.14E+03	5.70E+03	8.40E+03	2.54E+03	2.47E+02	2.12E+04								5.13E+04	3.47E+02	1.12E+05
25	Microzooplankto															4.44E+02			3.90E+02		5.70E+03		3.18E+02	6.18E+01	2.12E+04								1.75E+04	8.33E+01	1.96E+04
26	Hetero Microflag																									2.61E+04							7.75E+04	2.07E+01	4.94E+04
27	Pelag Bacteria																									1.30E+04	9.18E+04						2.75E+05	2.30E+02	2.00E+04
28	SusPoc Bacteria																										2.30E+04						4.55E+04	4.60E+01	1.15E+04
29	SedPOC Bacteria																										2.30E+04						6.91E+05	1.38E+02	3.34E+04
30	Benthic Alage														2.00E+02	8.88E+02				3.57E+03					2.12E+04								6.73E+04		5.17E+04
31	Phytoplankton										1.10E+02	7.83E+02		1.43E+02		2.22E+03			1.56E+03	1.07E+04	1.14E+04	1.26E+04		3.09E+02	1.27E+05	1.30E+04							1.29E+05	8.74E+02	2.35E+05
32	Detritus											8.70E+01	2.40E+01		2.00E+02	4.44E+02	5.50E+02			7.14E+03	3.42E+04	1.68E+04			2.12E+04	1.30E+04	1.53E+04	4.00E+05	8.00E+04	7.48E+05				7.56E+04
33	Imports																														1.45E+05	5.45E+05	4.45E+03
34	Biomasses	2.51E+02	1.41E+02	1.49E+02	3.10E+01	1.60E+02	1.51E+02	8.40E+01	1.30E+02	4.40E+01	1.84E+02	1.45E+02	4.00E+01	1.35E+02	2.00E+02	3.00E+02	3.93E+02	1.20E+02	2.44E+02	4.46E+03	1.14E+03	1.40E+03	1.06E+02	1.67E+01	1.51E+03	3.62E+02	9.00E+01	1.00E+03	2.00E+02	6.00E+02	3.30E+02	3.80E+03	2.53E+05
St. Marks River (Florida) Flow network janfeb.dat;mgC/m2 day
No of Compartments	51
No of Living Compartments	48
		1	2	3	4	5	6	7	8	9	10	11	12	13	14	15	16	17	18	19	20	21	22	23	24	25	26	27	28	29	30	31	32	33	34	35	36	37	38	39	40	41	42	43	44	45	46	47	48
		Phytoplankton	Halodule	Micro-epiphytes	Macro-epiphytes	Benthic algae	Bacterio plankton	Micro protozoa	Zooplankton	Epiphyte-graz amphipods	suspension-feed molluscs	Suspension-feed polychts	Benthic bact	Microfauna	Meiofauna	Deposit feed amphipods	Detritus feed crust	Hermit crab	Spider crab	Omnivorous crabs	Blue crab	Isopod	Brittle stars	Herbivorous shrimp	Predatory shrimp	Deposit-feed gastropod	Deposit-feed polycht	Predatory polycht	Predatory gastropod	Epiphyte-graz gastropod	Other gastropods	Catfish & stingrays	Tongue fish	Gulf flound & needle fish	Southrn hake & sea robins	Atl silverside & bay an	Gobies & blennies	Pinfish	Spot	Pipefish & seahorses	Sheepshead minnow	Red Drum	Killifish	Herbivorous ducks	Benthos-eating birds	Fish-eating birds	Fish & crust eating bir	Gulls	Raptors
1	Phytoplankton							6.88E+00	7.10E-01		2.83E+00	1.45E+00
2	Halodule									1.15E+00									3.28E+00	5.39E+00		6.91E+00		1.55E+00	3.00E-02							1.00E-01												4.20E-02
3	Micro-epiphytes									3.42E+00									1.80E-01	1.08E+00		6.90E+00		8.00E-02	2.00E-01					2.40E-01	4.80E-01										5.75E-01
4	Macro-epiphytes																																										4.50E-02	2.00E-03
5	Benthic algae									3.42E+00				2.70E+00	2.42E+01	3.89E+00	2.10E-01	1.02E+01	1.80E-01				5.18E+00			1.09E+01	4.40E-01									5.00E-02		4.60E-01	6.50E-01	8.00E-03	5.00E-02
6	Bacterio plankton							6.88E+00	5.00E-02		5.00E-01
7	Micro protozoa							6.40E-01	3.00E-02		2.10E-01
8	Zooplankton											2.00E-01																						3.40E-01	2.00E-03		5.00E-03	3.20E-01	6.00E-02	8.00E-03	7.00E-03		1.00E-03
9	Epiphyte-graz amphipods																			1.51E+00					4.70E-01			2.70E-01					9.20E-01			2.10E-01	1.00E-02	1.20E-01	2.90E-01	1.08E-01	1.40E-02	7.90E-02	3.00E-03
10	suspension-feed molluscs																				1.50E-01				1.30E-01			2.70E-01	1.20E+00								5.00E-03							1.00E-03	1.20E-02
11	Suspension-feed polychts																			2.20E-01					3.00E-02											1.00E-02									4.00E-03
12	Benthic bact									3.42E+00				1.01E+01	6.59E+01	6.04E+00	3.20E-01	1.02E+01		8.62E+00			8.40E+00		1.00E-01	1.14E+01	9.40E-01	8.10E-01										4.00E-02			5.00E-02		1.30E-02
13	Microfauna													6.80E-01	3.88E+00	3.10E-01	2.00E-02	2.10E-01					4.20E-01			2.30E-01	3.00E-02	9.00E-02
14	Meiofauna														2.91E+00			7.50E-01							7.00E-02	2.30E-01	3.30E-01	4.31E+00						1.00E-01			3.00E-02	8.50E-01	1.29E+00	1.60E-01	7.00E-03		7.00E-03
15	Deposit feed amphipods																			6.50E-01					2.40E-01			9.00E-02					4.80E-01			1.20E-01	1.00E-02	6.00E-02	1.30E-01	5.20E-02	6.70E-02	4.30E-02	2.00E-03
16	Detritus feed crust
17	Hermit crab																			1.08E+00	5.20E-01											2.90E-01			2.00E-03							6.10E-02			3.20E-02		5.00E-03	6.00E-02
18	Spider crab																				5.00E-01																											4.00E-02
19	Omnivorous crabs																				1.00E-02				1.00E-01							1.00E-01					1.00E-02					6.10E-02			8.00E-03		1.00E-03	1.00E-02
20	Blue crab																																															1.00E-02
21	Isopod																																				1.00E-02			4.00E-02
22	Brittle stars																																			4.00E-02
23	Herbivorous shrimp																				1.20E-01				7.10E-01							1.00E-01			1.16E-01	1.30E-01			1.60E-01	1.20E-02		4.90E-02
24	Predatory shrimp																				1.80E-01																					7.30E-02					2.00E-03	1.00E-02
25	Deposit-feed gastropod																			1.94E+00					2.40E-01			2.33E+00	6.10E+00															1.30E-02	2.96E-01
26	Deposit-feed polycht																			4.30E-01					4.00E-01			7.20E-01				1.00E-01				5.00E-02		6.00E-02	2.90E-01	4.00E-03		5.50E-02			1.60E-02
27	Predatory polycht																			6.50E-01					6.40E-01							2.00E-01				8.00E-02		1.00E-01	3.60E-01	8.00E-03		6.70E-02			2.40E-02
28	Predatory gastropod																																		8.30E-02
29	Epiphyte-graz gastropod																																												4.00E-03
30	Other gastropods																											9.00E-02	6.50E-01																4.00E-03
31	Catfish & stingrays																																																7.20E-02
32	Tongue fish
33	Gulf flound & needle fis																												1.80E-01																	5.00E-02			2.30E-02
34	Southrn hake & sea robin																												9.00E-02																		5.00E-03
35	Atl silverside & bay an																												9.00E-02																		5.00E-03	1.00E-02
36	Gobies & blennies																																														1.00E-03
37	Pinfish																																	7.00E-02									1.00E-03				1.00E-03
38	Spot																												6.50E-01			2.00E-01		1.18E+00		2.40E-01						7.90E-02	9.00E-03			3.00E-01	3.10E-02
39	Pipefish & seahorses
40	Sheepshead minnow																												1.80E-01													3.70E-02					1.00E-02	1.00E-02	2.00E-03
41	Red Drum
42	Killifish																												9.00E-02													6.00E-03					3.00E-03
43	Herbivorous ducks
44	Benthos-eating birds																																																8.00E-03
45	Fish-eating birds
46	Fish & crust eating bir
47	Gulls
48	Raptors
49	DOC						3.23E+01
50	Suspended POC							1.60E+00
51	Sediment POC												2.03E+02
52	Imports	2.83E+01	4.15E+01	2.65E+02	4.52E+00	1.70E+02			6.93E-01	2.28E+00	1.39E+00	1.84E-01	4.50E+01	1.33E+00		6.40E-02								1.11E+00		8.21E+00	1.83E+00	4.29E-01			6.64E-01	8.50E+00		1.73E-01	8.40E-02				2.16E+00		9.90E-02		8.80E-02			2.44E+00	1.05E-01	1.08E+00	8.50E-02
53	Biomasses	7.11E+01	4.96E+03	2.31E+02	9.46E+01	1.07E+03	1.09E+01	6.42E+00	2.78E+00	7.15E+01	4.15E+01	7.46E+00	2.62E+02	9.01E+01	1.06E+03	3.44E+01	2.51E+00	2.48E+02	3.70E+01	2.27E+02	1.43E+01	6.45E+01	3.75E+02	2.83E+01	5.75E+01	1.10E+03	5.46E+01	2.97E+02	4.38E+02	6.81E+00	1.98E+01	3.53E+02	2.41E+00	5.90E+01	8.96E+00	1.13E+01	8.10E-01	2.60E+00	8.90E+01	2.35E+00	8.39E+00	3.54E+01	2.26E+00	3.50E-01	1.89E+00	3.69E+01	1.17E+00	7.17E+00	1.85E+00
Lower Chesapeake Bay in Summer; Hagy 2001; mgC/m2/summer
No of Compartments	34
No of Living Compartments	31
		1	2	3	4	5	6	7	8	9	10	11	12	13	14	15	16	17	18	19	20	21	22	23	24	25	26	27	28	29	30	31	32	33	34
		Net Phytoplankton	Picoplankton	Free Bacteria	Particle Attached Bacter	Heteroflagellates	Ciliates	Rotifers	Meroplankton	Mesozooplankton	Ctenophores	Chrysaora	Microphytobenthos	SAV	Benthic Bacteria	Meiofauna	Deposit Feeding Benthos	Suspension Feeding Bentho	Oysters	Blue Crab	Menhaden	Bay anchovy	Herrings and Shads	White Perch	Spot	Croaker	Hogchoker	American eel	Catfish	Striped Bass	Bluefish	Weakfish	DOC	Sediment POC	POC	Exports	Respirations
1	Net Phytoplankton						1.60E+04	9.20E-02	3.50E+03	3.31E+04								2.56E+04			1.77E+04												4.88E+04		1.22E+04		3.88E+04
2	Picoplankton						8.00E+03		4.09E+02	4.21E+03								1.35E+03															2.02E+04		5.04E+03		8.56E+03
3	Free Bacteria					3.73E+04	8.00E+03																										1.84E+04		4.60E+03		1.07E+05
4	Particle Attached Bacter																	2.24E+03															1.22E+03		3.05E+02		5.88E+03
5	Heteroflagellates						8.00E+03																										1.66E+04		4.14E+03		8.58E+03
6	Ciliates								1.34E+03	1.39E+04												5.10E+02											1.02E+04		2.54E+03		1.16E+04
7	Rotifers
8	Meroplankton										6.56E+01										4.91E+02	7.14E+02											1.41E+03		1.41E+03		1.76E+03
9	Mesozooplankton									3.02E+03	3.21E+03										4.91E+02	8.67E+03											1.82E+04		1.82E+04		8.44E+03
10	Ctenophores											9.20E-02																					1.27E+03		1.27E+03		7.41E+02
11	Chrysaora
12	Microphytobenthos															9.02E+03	5.27E+03																3.63E+03	3.63E+03			5.43E+03
13	SAV																																	1.64E+03
14	Benthic Bacteria															4.51E+03	3.95E+03																7.21E+03	7.21E+03			5.34E+04
15	Meiofauna																3.95E+03			1.89E+01					9.44E+01	3.91E+01	1.93E+02							9.23E+03			4.51E+03
16	Deposit Feeding Benthos																			1.89E+02					1.13E+03	4.69E+02	6.76E+02			3.96E+01		6.60E+01	3.17E+03	1.27E+04			7.90E+03
17	Suspension Feeding Benth																			9.44E+01					6.61E+02	2.74E+02	1.06E+03			1.98E+01		6.60E+01	5.84E+03	2.34E+04			1.35E+04
18	Oysters																																			1.00E-07
19	Blue Crab																													1.98E+01				1.77E+02		1.00E+02	9.31E+01
20	Menhaden																													1.98E+02	3.55E+01	5.94E+02	7.65E+02	2.30E+03	7.65E+02	2.82E+03	1.22E+04
21	Bay anchovy																													7.91E+01	1.38E+02	1.98E+02		4.81E+03	1.20E+03	4.98E+02	3.28E+03
22	Herrings and Shads																																			1.00E-07
23	White Perch																																			1.00E-07
24	Spot																													3.96E+01	6.66E+01	3.96E+02	3.07E+02		3.07E+02	2.32E+01	7.59E+02
25	Croaker																														2.04E+02		1.26E+02		1.26E+02	1.20E+01	3.14E+02
26	Hogchoker																																4.93E+02		4.93E+02		9.46E+02
27	American eel																																			1.00E-07
28	Catfish																																			1.00E-07
29	Striped Bass																																3.73E+01		3.73E+01	2.21E+01	2.99E+02
30	Bluefish																																4.92E+01		4.92E+01	2.12E+01	3.25E+02
31	Weakfish																																1.32E+02		1.32E+02	1.33E+02	9.22E+02
32	DOC			1.75E+05																																1.53E+03
33	Sediment POC														7.63E+04	4.51E+03	1.32E+04			7.55E+01																1.13E+04
34	POC				9.65E+03				5.84E+02	6.02E+03								1.57E+04			9.83E+02	3.06E+02												1.96E+04
35	Imports	1.96E+05	4.77E+04										2.70E+04	1.64E+03					1.00E-07	1.29E+01			1.00E-07	1.00E-07	1.10E+01			1.00E-07	1.00E-07				1.84E+04	2.08E+04
36	Biomasses	2.11E+03	3.73E+02	1.26E+03	3.90E+01	4.30E+01	8.70E+01	1.00E-03	3.80E+01	1.07E+03	1.08E+02	1.00E-03	2.93E+02	1.99E+03	2.20E+02	7.00E+02	4.09E+03	6.96E+03	1.00E-03	3.42E+02	2.14E+03	3.81E+02	1.00E-03	1.00E-03	5.70E+02	2.36E+02	1.00E+02	1.00E-03	1.00E-03	1.72E+02	6.80E+01	2.11E+02	2.69E+04	7.61E+04	8.31E+03
*** WARNING!! *** The analysis of the data in this network has not yet been published. These values should not be used for any other purpose than to recapitulate the calculations appearing in this article. For further information, contact Jacqueline Grebmeier <jgrebmei@umces.edu>.
PACMars Chukchi Trophic Network SE
No of Compartments	51
No of Living Compartments	48
		1	2	3	4	5	6	7	8	9	10	11	12	13	14	15	16	17	18	19	20	21	22	23	24	25	26	27	28	29	30	31	32	33	34	35	36	37	38	39	40	41	42	43	44	45	46	47	48
		Phytoplankton	Ice Algae	Krill	Zooplktn - copepods	Zooplktn - other	Pelagic Bacteria	Gelatinous Zooplktn	Shrimp	Benth Bact	Sipunculids	Polychaetes	Amphipods	Urochordates (benth)	Anemones & corals	Urchins & Dollars	Cukes	Brittle Stars	Sea Stars	C opilio	Crabs - other	Snails	Bivalves	Meiofauna	Salmon	Pollock	Arctic Cod	Saffron Cod	Prickleback	Other Pel Fish	Eelpout	Sculpin	Flatfish	Othr Demer Fish	Auklets	Gulls	Puffins	Shearwaters	Kittiwakes	Murres & Murrelets	Diving Ducks	Spotted Seal	Ringed Seal	Bearded Seal	Pacific Walrus	Bowhead Whale	Gray Whale	Beluga Whale	Polar Bear
1	Phytoplankton			1.36E-01	7.26E+00	7.10E-01	2.42E+01	1.55E-03						1.96E+00		9.65E-01				2.80E-03		6.91E-02	1.09E+01
2	Ice Algae			3.09E-02	1.93E+00	1.83E-01	4.58E+00	3.87E-04						6.20E-01		2.57E-01				8.47E-04		1.88E-02	3.38E+00
3	Krill																	1.58E-02							6.12E-04		4.29E-02								6.62E-02											2.51E-03	5.42E-03
4	Zooplktn - copepods			6.37E-02		7.12E-01		5.15E-02						8.58E-01			4.78E-02								3.47E-03	2.99E-04	1.10E-01			7.38E-03		4.42E-03		4.37E-04	5.51E-02	3.75E-05	5.74E-06	7.24E-04	3.63E-05	2.61E-03						1.60E-02
5	Zooplktn - other							1.43E-02	6.02E-02						1.75E-03		3.91E-02			5.31E-03					1.38E-03	4.67E-04	1.36E-01	1.71E-02	2.70E-02	4.79E-02	1.33E-04	5.85E-02	3.44E-02	7.20E-03	2.04E-02	7.79E-06	1.58E-06	3.60E-03	7.51E-06	7.22E-04			7.51E-04			6.21E-03
6	Pelagic Bacteria				1.88E+01	4.65E-01		4.13E-03						6.15E-01				4.09E-02
7	Gelatinous Zooplktn																															5.53E-03
8	Shrimp																									2.10E-05	5.97E-03	6.37E-03	1.51E-02	1.78E-04	7.70E-05	1.48E-02	1.08E-02	8.55E-03								1.38E-04	4.94E-03	2.76E-03	7.49E-03	8.10E-05	1.16E-04	4.08E-04
9	Benth Bact										2.03E+00	1.37E+01	1.26E+01		3.23E-03								1.48E+01	3.90E+00
10	Sipunculids																			2.25E-02	1.12E-01	9.10E-02									4.89E-04	1.57E-02	1.27E-03	2.36E-04			2.10E-06		2.50E-05		5.42E-04				3.90E-03	8.49E-05	1.21E-04
11	Polychaetes								4.13E-02								1.35E-02		7.52E-03	2.07E-01	1.14E-01	9.33E-02				5.26E-06	3.27E-03	7.66E-04	1.66E-01	1.91E-04	2.86E-03	4.26E-02	8.24E-03	5.33E-03										1.17E-04	1.60E-02	8.72E-05	2.49E-04
12	Amphipods								4.23E-02						1.33E-03		4.05E-02	2.41E-02		4.69E-02						2.00E-04	7.07E-02	5.24E-03	6.86E-02	3.91E-04	7.97E-03	2.75E-01	2.52E-02	1.39E-02		2.75E-05	2.21E-06					1.51E-04	2.15E-03	1.20E-04	1.63E-02	1.79E-04	1.53E-02
13	Urochordates (benth)																						1.41E+00			5.27E-06	1.43E-02	1.38E-04		2.05E-04	9.19E-05	3.91E-03	7.25E-04	2.61E-04
14	Anemones & corals																			3.28E-03													2.52E-04													1.43E-04	2.05E-04
15	Urchins & Dollars																		1.28E-02	6.38E-03												1.53E-03	2.40E-04												2.60E-02	1.38E-04	3.96E-04
16	Cukes																			6.32E-02											2.63E-04	5.78E-03	1.06E-03								4.35E-05					2.56E-04	3.65E-04
17	Brittle Stars																			4.24E-02											1.49E-04	3.08E-03	5.76E-04													7.87E-05	1.13E-04
18	Sea Stars																			3.66E-03										1.81E-04											2.87E-05					8.22E-05	1.18E-04
19	C opilio																														7.65E-04	1.56E-01	1.95E-03	6.96E-03										1.87E-03	6.56E-03	6.97E-05	9.99E-05
20	Crabs - other																			2.46E-02							1.13E-03		2.26E-02		5.89E-05	4.72E-02	9.53E-03	3.63E-04				3.11E-04						5.63E-04	3.11E-03	6.54E-05	9.40E-05
21	Snails																4.07E-02		2.97E-03	2.35E-02												2.21E-03	6.84E-04	2.49E-04							1.45E-04			2.40E-04	2.46E-02	8.97E-05	1.28E-04
22	Bivalves								3.62E-02						1.18E-03		1.17E-02	2.13E-02	2.67E-02	1.44E-01	1.03E-01	8.19E-02					1.37E-03		2.76E-02		1.56E-03	7.31E-03	2.95E-03	2.10E-04							2.22E-04			3.46E-03	2.47E-01	3.03E-04	8.68E-04
23	Meiofauna								7.57E-03		2.23E-01	1.46E+00	1.31E+00		7.33E-04	4.22E-01	5.21E-03			2.37E-02	1.50E-02	7.76E-03	7.84E+00	2.83E+00
24	Salmon
25	Pollock																									5.22E-06					3.26E-05	6.76E-04	1.11E-04	1.19E-04	6.47E-05	1.42E-06	1.37E-07		1.32E-06	8.57E-06
26	Arctic Cod																									2.14E-05	7.36E-03				1.50E-03	8.38E-03	6.12E-02	4.89E-04	4.94E-03	4.07E-04	3.95E-05	4.04E-03	7.18E-04	1.23E-03		6.39E-03	4.49E-02	2.13E-04				2.32E-03
27	Saffron Cod																																					7.47E-04				2.42E-03	3.05E-02	3.96E-04				3.08E-04
28	Prickleback																										2.42E-02	2.35E-02				4.10E-03	1.25E-03		9.99E-04	4.41E-05	4.49E-06	6.80E-04	7.67E-05	1.09E-04		2.20E-03
29	Other Pel Fish																														2.41E-04	2.11E-03	1.65E-02		3.80E-04	3.23E-04	3.13E-05	2.76E-03	6.21E-05	5.76E-04		9.53E-03	2.08E-03	7.56E-05				3.17E-03
30	Eelpout																														1.15E-04	5.01E-03	1.85E-03	6.34E-04														5.55E-05
31	Sculpin																															8.06E-03	2.94E-03	1.42E-03						3.13E-04		3.93E-03	3.86E-03	1.24E-03				1.61E-04
32	Flatfish																										1.82E-02				4.63E-04	1.05E-02	5.72E-03	5.96E-04								7.05E-04		1.02E-03
33	Othr Demer Fish																										2.91E-03				1.05E-03	2.31E-02	1.17E-03	2.21E-03								4.06E-04
34	Auklets
35	Gulls
36	Puffins
37	Shearwaters
38	Kittiwakes
39	Murres & Murrelets
40	Diving Ducks
41	Spotted Seal
42	Ringed Seal																																												3.50E-03				1.95E-03
43	Bearded Seal																																												1.93E-03				4.18E-04
44	Pacific Walrus
45	Bowhead Whale
46	Gray Whale
47	Beluga Whale																																																2.64E-04
48	Polar Bear
49	POC						3.93E+01
50	Benth detritus								6.50E-02	1.42E+02	1.05E+00	6.96E+00	6.30E+00		3.84E-03	2.08E+00	2.66E-02	6.74E-02	5.28E-03	1.22E-01	6.85E-02	5.37E-02	1.63E+01	7.96E+00
51	DOC						2.17E+01
52	Imports	3.73E+02	3.65E+01
53	Biomasses	6.13E+00	3.50E-01	2.10E-02	5.41E-01	1.72E-01	3.22E-02	2.23E-02	1.60E-02	3.93E-02	2.88E-01	4.06E+00	3.02E+00	1.71E+00	7.10E-03	7.69E+00	2.24E-01	5.20E-02	7.90E-02	1.42E+00	1.98E-01	1.32E-01	1.91E+01	2.70E-02	7.57E-04	2.86E-06	7.15E-02	4.52E-03	6.11E-02	1.10E-02	3.49E-03	1.34E-01	2.90E-02	7.05E-03	7.05E-03	6.79E-05	5.63E-06	8.66E-04	5.07E-05	3.60E-04	1.23E-04	4.41E-03	1.32E-02	3.59E-03	1.83E-01	2.63E-02	2.09E-02	2.34E-03	7.81E-04
*** WARNING!! *** The analysis of the data in this network has not yet been published. These values should not be used for any other purpose than to recapitulate the calculations appearing in this article. For further information, contact Jacqueline Grebmeier <jgrebmei@umces.edu>.
PACMars Chukchi Trophic Network NE
No of Compartments	51
No of Living Compartments	48
		1	2	3	4	5	6	7	8	9	10	11	12	13	14	15	16	17	18	19	20	21	22	23	24	25	26	27	28	29	30	31	32	33	34	35	36	37	38	39	40	41	42	43	44	45	46	47	48
		Phytoplankton	Ice Algae	Krill	Zooplktn - copepods	Zooplktn - other	Pelagic Bacteria	Gelatinous Zooplktn	Shrimp	Benth Bact	Sipunculids	Polychaetes	Amphipods	Urochordates (benth)	Anemones & corals	Urchins & Dollars	Cukes	Brittle Stars	Sea Stars	C opilio	Crabs - other	Snails	Bivalves	Meiofauna	Salmon	Pollock	Arctic Cod	Saffron Cod	Prickleback	Other Pel Fish	Eelpout	Sculpin	Flatfish	Othr Demer Fish	Auklets	Gulls	Puffins	Shearwaters	Kittiwakes	Murres & Murrelets	Diving Ducks	Spotted Seal	Ringed Seal	Bearded Seal	Pacific Walrus	Bowhead Whale	Gray Whale	Beluga Whale	Polar Bear
1	Phytoplankton			1.73E-02	2.16E+00	2.43E-01	2.22E+01	1.44E-03				1.35E+00	1.83E-01	6.69E-02		1.22E-02	8.50E-03						7.72E-01	1.05E-01
2	Ice Algae			3.71E-03	7.87E-01	9.53E-02	5.48E+00	5.32E-04				2.43E-01	3.29E-02	2.67E-02		4.66E-03	1.67E-03						1.96E-01	1.61E-02
3	Krill																								1.77E-10		1.65E-02								1.51E-05			1.69E-03	1.93E-05				1.69E-03			6.33E-02	6.26E-04
4	Zooplktn - copepods			1.29E-02		2.64E-01		5.58E-02						3.41E-02			2.34E-02								1.84E-10	2.17E-04	9.80E-03			2.47E-03		1.24E-04		4.19E-05	1.81E-05	3.37E-06	1.98E-07	3.28E-04	1.13E-05	3.09E-01						9.43E-02
5	Zooplktn - other							1.35E-02	7.98E-02						2.86E-02		1.58E-02			7.15E-04					6.11E-11	3.57E-04	1.36E-02	1.05E-03	1.26E-03	1.93E-02	9.72E-05	1.49E-03	4.48E-04	6.13E-04	6.32E-06	6.32E-07	4.91E-08	1.48E-03	2.09E-06	6.57E-02			9.94E-05			3.45E-02
6	Pelagic Bacteria				7.55E+00	1.86E-01		4.91E-03						2.66E-02				1.13E-01
7	Gelatinous Zooplktn																															1.52E-04
8	Shrimp																									1.55E-05	1.98E-03	6.63E-04		1.13E-04	3.69E-04	2.18E-03	7.25E-04	3.55E-03								7.47E-06	2.63E-03	5.19E-04	1.15E-04		1.06E-02	1.63E-03
9	Benth Bact										2.02E+01	2.14E+01	3.68E+00		2.36E-01								6.93E+00	9.85E-01
10	Sipunculids																			1.43E-02	1.35E-01	3.44E-02									2.66E-03	2.59E-03	9.50E-05	1.11E-04			3.39E-07		3.58E-05						6.66E-05		2.35E-03
11	Polychaetes								2.52E-01								3.00E-02		3.78E-03	1.07E-01	1.13E-01	2.87E-02				3.88E-06	9.79E-04	6.86E-05	3.38E-02	1.13E-04	1.24E-02	5.59E-03	4.96E-04	2.03E-03							1.48E-03			2.05E-05	2.26E-04		3.90E-04	4.62E-04
12	Amphipods								2.66E-01						8.82E-02		9.23E-02	2.27E-01		2.51E-02						1.63E-04	2.44E-02	5.03E-04	1.78E-02	2.27E-04	3.45E-02	3.53E-02	1.46E-03	5.42E-03		9.30E-06	2.97E-07				1.55E-03	7.72E-06	2.72E-03	2.14E-05	2.37E-04		2.36E-02	4.84E-04
13	Urochordates (benth)																						7.37E-02								1.08E-04	1.61E-04	1.50E-05	3.31E-05											4.68E-05
14	Anemones & corals																			1.87E-03													1.87E-05												1.07E-04		3.68E-04
15	Urchins & Dollars																		4.18E-03	2.00E-03												1.32E-04	9.89E-06												2.38E-04		3.99E-04
16	Cukes																			2.68E-02											8.29E-04	5.27E-04	4.47E-05														4.38E-04
17	Brittle Stars																			1.95E-02											5.74E-04	3.75E-04	3.23E-05														1.62E-04
18	Sea Stars																			1.53E-03										1.13E-04																	1.52E-04
19	C opilio																												3.58E-03		3.66E-03	2.30E-02	1.36E-04	2.83E-03										3.37E-04	9.79E-05		1.70E-04
20	Crabs - other																			1.48E-02							4.62E-04		3.90E-03		3.34E-04	8.18E-03	7.89E-04	1.71E-04										1.15E-04	5.24E-05		1.83E-04	4.30E-04
21	Snails																5.22E-02		1.09E-03	7.69E-03												1.74E-04	2.54E-05	5.80E-05										2.71E-05	2.24E-04		1.28E-04
22	Bivalves								1.87E-01						6.29E-02		2.17E-02	1.59E-01	1.26E-02	6.33E-02	8.46E-02	2.16E-02					3.96E-04		9.30E-03		5.77E-03	8.64E-04	1.62E-04	6.87E-05							1.12E-03			5.19E-04	3.04E-03		1.19E-03
23	Meiofauna										1.05E+00	1.14E+00	1.55E-01	3.36E-02		1.73E-02	7.90E-03					1.18E-02		2.22E-01					3.11E-03
24	Salmon
25	Pollock																									3.88E-06					3.70E-05	4.63E-05	4.10E-06	1.68E-05		1.87E-07	7.04E-09		5.94E-07	6.67E-04
26	Arctic Cod																									1.55E-05	4.38E-04				5.69E-04	1.18E-04	4.37E-04	2.46E-05		2.03E-05	7.30E-07		1.21E-04	5.82E-02		4.52E-05	3.79E-03	6.74E-06				1.69E-03
27	Saffron Cod																																									1.08E-05	2.10E-03	1.03E-05				1.62E-04
28	Prickleback																										2.99E-03					2.87E-04	4.07E-05			9.07E-06	3.62E-07		5.55E-05	3.67E-02		6.78E-05
29	Other Pel Fish																														7.42E-05	3.09E-05	1.40E-04			1.69E-05	5.92E-07	1.70E-03	1.08E-05	1.74E-02		8.10E-05	1.91E-04	2.57E-06				2.61E-03
30	Eelpout																														9.17E-04	1.13E-03	1.87E-04	4.40E-04														4.13E-04
31	Sculpin																															3.28E-04	5.71E-05	1.96E-04						6.00E-02		7.55E-05	5.71E-04	9.02E-05				2.80E-04
32	Flatfish																										1.77E-03				6.24E-04	4.05E-04	1.04E-04	8.03E-05								1.30E-05		7.23E-05
33	Othr Demer Fish																										9.50E-04				4.87E-03	3.31E-03	7.64E-05	8.84E-04								2.13E-05			1.09E-04
34	Auklets
35	Gulls
36	Puffins
37	Shearwaters
38	Kittiwakes
39	Murres & Murrelets
40	Diving Ducks																																												1.23E-04
41	Spotted Seal
42	Ringed Seal																																												1.41E-05				4.18E-06
43	Bearded Seal																																												2.53E-05				2.92E-06
44	Pacific Walrus
45	Bowhead Whale
46	Gray Whale
47	Beluga Whale																																																5.52E-07
48	Polar Bear
49	POM			1.74E-01			7.60E+01							3.73E-02
50	Benth detritus								2.69E-01	1.34E+02	5.22E+00	5.63E+00	7.71E-01	8.05E-02	1.38E-01	8.39E-02	4.07E-02	3.33E-01	1.86E-03	4.45E-02	5.61E-02	1.43E-02	5.49E+00	6.91E-01
51	DOM						4.24E+01			3.48E+01														9.67E-01
52	Imports	1.10E+02	9.18E+00
53	Biomasses	4.10E+00	7.00E-02	1.60E-02	5.03E-01	1.41E-01	1.29E-01	5.84E-02	5.30E-02	3.93E-02	1.92E+00	5.06E+00	5.49E-01	3.29E-01	3.54E-01	2.95E-01	3.89E-01	3.54E-01	3.60E-02	5.94E-01	1.78E-01	2.85E-02	4.66E+00	2.70E-02	1.00E-10	1.69E-07	7.77E-03	3.59E-07	7.50E-03	7.25E-05	8.12E-03	7.89E-03	7.68E-04	1.58E-03	3.63E-06	1.17E-05	3.75E-07	8.45E-04	3.16E-05	7.02E-05	2.78E-04	1.07E-04	3.88E-03	3.59E-04	1.42E-03	2.63E-01	9.53E-03	5.60E-03	3.15E-06
Cypress Wet Season; Mammals & Opossum Corrected; R Added 7/25/2000
No of Compartments	68
No of Living Compartments	65
		1	2	3	4	5	6	7	8	9	10	11	12	13	14	15	16	17	18	19	20	21	22	23	24	25	26	27	28	29	30	31	32	33	34	35	36	37	38	39	40	41	42	43	44	45	46	47	48
		Living POC	Living SED	Phytoplankton	Float Veg	Periphyton	Macrophytes	Epiphytes	Understory	Vine L	Hardwood L	Cypress L	Cypress W	Hardwood W	Roots	Crayfish	Apple Snail	Prawn	Aquatic I	Terrst I	Fish HO	Fish PC	L Fish	Alligators	Turtles	Lizards	Snakes	Salamanders	L Frog	M Frog	S Frog	Salam L	Tadpoles	Pelecaniformes	Anseriformes	Vultures	Kites & Hawks	Galliformes	Egrets	GB Heron	Other Herons	Wood stork	White ibis	Gruiformes	Owls	Caprimulgiformes	Hummingbirds	Woodpeckers	Passeriformes onniv
1	Living POC															1.78E+00	1.87E-01	2.71E+00	8.52E-01		2.36E-01	7.00E-03	6.25E-04										1.02E-03
2	Living SED															4.44E-01	4.70E-02	5.48E-01	8.52E-01		9.40E-02	4.00E-03	6.63E-04										5.10E-04
3	Phytoplankton	1.99E-01														4.44E-01	4.70E-02	2.06E+00	1.28E+00		2.36E-01	9.00E-03											3.06E-03
4	Float Veg																				7.10E-02	2.00E-03			5.42E-02										2.03E-02
5	Periphyton		4.07E+01													1.33E+00	3.27E-01	6.99E+00	1.28E+00		2.36E-01	9.00E-03			9.36E-02								4.59E-03
6	Macrophytes															1.78E+00					2.36E-01	2.00E-03			5.03E-02										1.88E-02
7	Epiphytes																				1.18E-01	2.00E-03
8	Understory																			9.74E-01															2.18E-02			2.88E-02									1.48E-07	1.37E-03	2.45E-04
9	Vine L																			5.95E-01
10	Hardwood L																			8.12E-01															2.06E-02			2.73E-02									1.40E-07	1.30E-03	2.31E-04
11	Cypress L																			5.41E-01
12	Cypress W																			5.41E-02
13	Hardwood W																			5.41E-02
14	Roots																			1.08E-01
15	Crayfish																						7.95E-03	2.59E-02	1.02E-01		2.23E-02	3.81E-02	1.34E-02	3.15E-02	6.60E-03			3.51E-04			1.56E-03		8.40E-03	1.07E-03	7.38E-04	4.02E-05	1.21E-02	9.08E-05	5.50E-03
16	Apple Snail																					9.90E-03	1.99E-03	2.60E-03	1.14E-02		2.64E-03	3.83E-03	1.22E-03	2.88E-03	6.02E-04						1.57E-04		8.43E-04	9.79E-05	6.73E-05	3.67E-06	1.21E-03	8.28E-06	5.51E-04
17	Prawn																					2.70E-02	1.19E-02	1.64E-02	6.45E-02		1.40E-02	2.40E-02	8.46E-03	1.99E-02	4.16E-03			2.21E-04			9.86E-04		5.29E-03	6.76E-04	4.65E-04	2.54E-05	7.63E-03	5.72E-05	3.46E-03
18	Aquatic I																				7.08E-01	8.00E-02	2.19E-02	5.44E-03	2.15E-02		4.85E-03	8.01E-03	2.82E-03	6.63E-03	1.39E-03	5.12E-03		7.38E-05			3.29E-04		1.76E-03	2.25E-04	1.55E-04	8.46E-06	2.54E-03	1.91E-05	1.15E-03
19	Terrst I																				1.18E-01	4.00E-03	1.33E-03	3.94E-03	1.56E-02	2.60E-01	3.38E-03	5.80E-03	2.04E-03	4.79E-03	1.00E-03				9.05E-03		2.38E-04	2.41E-02	1.28E-03	1.63E-04	1.12E-04	6.12E-06	1.84E-03	1.38E-05	8.35E-04	1.74E-03	2.87E-07	2.67E-03	4.76E-04
20	Fish HO																					1.98E-02	9.50E-03	2.53E-01	4.81E-02		1.56E-01	1.41E-02	8.00E-03					2.13E-05			9.51E-05		5.62E-04	6.52E-05	4.49E-05	2.45E-06	8.09E-04	5.52E-06	3.68E-04
21	Fish PC																						6.63E-03	3.80E-02	1.30E-02		2.37E-02	2.11E-03	1.32E-03					3.52E-06			1.57E-05		8.43E-05	1.08E-05	7.40E-06	4.04E-07	1.21E-04	9.11E-07	5.51E-05
22	L Fish																							2.17E-02	8.23E-03		1.13E-02										1.19E-05			3.18E-05		1.21E-06			4.20E-05
23	Alligators																								1.52E-02		1.85E-02										8.75E-05			2.33E-04		8.88E-06			3.07E-04
24	Turtles																							5.02E-02										2.50E-05			6.26E-05				2.95E-05	1.61E-06			2.20E-04
25	Lizards																							1.88E-02			7.06E-03							8.13E-06			2.04E-05		1.26E-04	1.40E-05	9.61E-06	5.25E-07	2.25E-03	4.74E-05	7.17E-05
26	Snakes																							4.78E-02	5.08E-03			1.71E-03						2.07E-05			5.19E-05		3.20E-04	3.56E-05	2.45E-05	1.34E-06	5.73E-03		2.10E-04
27	Salamanders																							3.52E-02	4.80E-03		1.50E-02							1.13E-05			2.83E-05		1.29E-04	1.94E-05	1.34E-05	7.29E-07	2.31E-03		9.95E-05
28	L Frog																							4.78E-03			1.77E-02							3.25E-06			8.16E-06								2.87E-05
29	M Frog																							6.81E-03	1.87E-03		3.18E-02							4.64E-06			1.16E-05		6.25E-05	7.98E-06	5.48E-06	2.99E-07	4.47E-04	2.70E-05	4.09E-05
30	S Frog																							6.42E-04	1.76E-04		7.15E-03							9.70E-07			2.44E-06		1.31E-05	1.67E-06	1.15E-06	6.27E-08	9.36E-05	5.66E-06	8.56E-06
31	Salam L																							6.03E-04			1.72E-03	6.45E-04															6.09E-05	1.47E-06
32	Tadpoles																							2.82E-04	1.13E-03		4.59E-03	4.97E-04															9.26E-05	2.24E-06
33	Pelecaniformes
34	Anseriformes																							1.59E-03			3.30E-03
35	Vultures
36	Kites & Hawks
37	Galliformes																							1.42E-03	4.95E-03		2.93E-03
38	Egrets																							3.83E-03			7.93E-03
39	GB Heron
40	Other Herons
41	Wood stork
42	White ibis																							7.79E-03			1.61E-02
43	Gruiformes
44	Owls
45	Caprimulgiformes																																						9.07E-05		8.10E-06
46	Hummingbirds
47	Woodpeckers																										1.95E-04												2.79E-04		2.49E-05
48	Passeriformes onniv																								2.02E-04		1.26E-04										1.80E-06		4.33E-05	1.00E-06	3.87E-06	4.99E-08			6.00E-06
49	Passeriformes pred																								2.45E-04		1.53E-04										1.80E-06		6.81E-05	1.00E-06	6.08E-06	4.99E-08			6.00E-06
50	Opossum
51	Shrews																																						7.09E-06		7.17E-07
52	Bats
53	Black Bear
54	G Fox
55	Raccoon
56	Mink
57	Otter
58	Florida Panther
59	Bobcat
60	Squirrels
61	Mice & Rats																							1.01E-04	1.80E-03		7.03E-04										2.54E-06		8.16E-05	1.41E-06	8.25E-05	7.06E-08			8.47E-06
62	Rabbits																							7.78E-04													3.59E-06		1.83E-04		1.85E-04	9.98E-08			1.20E-05
63	White-Tailed Deer
64	Hogs
65	Armadillo
66	Refractory Det	5.55E+00	5.70E+01																4.26E-01	3.25E-01	7.10E-02	2.00E-03											5.10E-04
67	Liable Det	3.58E+01	2.03E+02													3.11E+00	3.27E-01	1.37E+00	3.83E+00	1.20E+00	2.36E-01	4.00E-03											5.10E-04
68	Vert det																			7.78E-01																4.50E-02
69	Imports	2.46E-03		1.08E+02	2.36E+02	2.68E+02	2.36E+02	3.60E-01	1.22E+02	2.66E+00	1.16E+02	3.26E+02	2.03E+00	2.02E-01	1.95E-01																								1.69E-01	2.66E-02	1.84E-02	1.03E-03	3.46E-01
70	Biomasses	1.93E-02	2.65E+00	7.14E-02	5.50E+01	8.99E+01	4.83E+01	5.63E-02	5.60E+01	6.86E-01	5.30E+01	1.51E+02	1.07E+04	8.00E+02	4.69E+02	1.48E+00	1.35E-01	9.33E-01	3.11E-01	2.25E-01	9.00E-02	1.49E-02	1.13E-02	8.27E-02	5.92E-02	1.93E-02	4.91E-02	2.68E-02	7.72E-03	1.10E-02	2.30E-03	6.00E-04	9.12E-04	8.51E-06	1.03E-03	5.13E-04	4.17E-05	9.15E-04	2.24E-04	3.03E-05	2.27E-05	1.16E-06	4.25E-04	3.19E-06	1.47E-04	1.98E-05	1.58E-09	6.10E-05	9.45E-06
Network of Ems Estuary; The Netherlands. Biom. mgC/m2; Flows mgC/m2/d
No of Compartments	15
No of Living Compartments	12
		1	2	3	4	5	6	7	8	9	10	11	12	13	14	15
		Pelagic producers	Benthic producers	Pelagic bacteria	Microzooplankton	Mesozooplankton	Invert carnivores	Benth susp feeders	Meiofauna	Deposit feeders	Benth Invert Carnivore	Benth feeding fish	Birds	DOC	Suspended POC	Sediment POC	Exports	Respirations
1	Pelagic producers				4.62E+01	3.20E+00								4.64E+01	3.50E+00			5.72E+01
2	Benthic producers							2.03E+01	4.50E+01	2.11E+01	1.62E+01					2.00E-01		3.07E+01
3	Pelagic bacteria				8.80E+00										5.40E+00			5.60E+00
4	Microzooplankton				3.30E+00	5.90E+00	8.00E-01								2.42E+01			2.76E+01
5	Mesozooplankton					1.40E+00	1.40E+00								5.20E+00		1.40E+00	9.40E+00
6	Invert carnivores														2.00E+00		1.00E-01	1.00E-01
7	Benth susp feeders										2.20E+00		1.90E+00			5.20E+00		1.10E+01
8	Meiofauna								1.53E+01	5.20E+00	7.70E+00					1.99E+01		3.49E+01
9	Deposit feeders										5.80E+00		1.90E+00			2.15E+01		1.71E+01
10	Benth Invert Carnivore										2.80E+00	9.00E-01	3.00E-01			4.80E+00		2.92E+01
11	Benth feeding fish															4.00E-01	1.00E-01	4.00E-01
12	Birds															8.00E-01	1.00E-01	3.20E+00
13	DOC			1.98E+01													2.66E+01
14	Suspended POC				3.50E+00	8.30E+00									6.90E+00	2.80E+01	4.00E-01	1.00E-01
15	Sediment POC								2.27E+01	2.00E+01	3.30E+00					2.34E+02	1.48E+01	2.00E+01
16	Imports	1.57E+02	1.34E+02
17	Biomasses	8.95E+02	2.65E+03	4.00E+01	9.40E+01	6.50E+01	3.00E+01	9.10E+02	5.00E+02	9.00E+02	5.00E+02	1.25E+02	2.00E+01	1.12E+04	2.10E+03	5.79E+06
Aggregated Flow Model; Kromme Est. Biom. mgC/m2; Flows mgC/m2/day
No of Compartments	16
No of Living Compartments	13
		1	2	3	4	5	6	7	8	9	10	11	12	13	14	15	16
		phytoplankton	macrophytes	benthic algae	pelagic bacteria	microzooplankton	mesozooplankton	zooplanktiv fish	susp feeding invert	detritivores	meiofauna	carnivorous fish	benth feed fish	mugilidae	DOC	suspended POC	sediment POC	Exports	Respirations
1	phytoplankton						2.00E+01	2.00E-01	1.00E+00						7.10E+00				2.10E+01
2	macrophytes														5.00E+00		2.08E+03		2.14E+03
3	benthic algae									1.39E+02	1.28E+01		4.40E+00	2.19E+01			4.00E-01		9.90E+01
4	pelagic bacteria					6.00E+00										6.00E-01			5.50E+00
5	microzooplankton					2.40E+00	7.00E-01									1.10E+00			4.20E+00
6	mesozooplankton							5.60E+00				1.20E+00				2.02E+01	1.77E+01		3.45E+01
7	zooplanktiv fish											5.00E-01				9.00E-01	1.10E+00	2.00E-01	3.10E+00
8	susp feeding invert											1.90E+00	2.80E+00				2.65E+02		2.50E+02
9	detritivores											9.00E-01	6.60E+00				1.63E+02		3.81E+02
10	meiofauna																2.02E+02		1.55E+02
11	carnivorous fish																3.40E+00	8.00E-01	2.30E+00
12	benth feed fish											1.00E+00					5.60E+00	1.20E+00	6.00E+00
13	mugilidae											1.00E+00					1.66E+01	1.50E+00	8.30E+00
14	DOC				1.21E+01
15	suspended POC						5.85E+01		5.19E+02							5.00E+00			2.00E+00
16	sediment POC									4.13E+02	3.44E+02			5.50E+00		4.18E+02	2.71E+03		1.58E+03
17	Imports	4.93E+01	4.23E+03	2.77E+02												1.39E+02
18	Biomasses	4.13E+02	1.62E+05	2.00E+02	2.65E+01	5.90E+00	1.68E+02	2.90E+00	2.16E+04	1.83E+04	3.25E+03	1.18E+03	2.02E+03	4.56E+03	2.70E+03	3.29E+05	1.30E+06
Okefenokee Marsh; Caudle-Smith et al. Unpl. Ms; TIE; g dry biomas/m2/y
No of Compartments	24
No of Living Compartments	21
		1	2	3	4	5	6	7	8	9	10	11	12	13	14	15	16	17	18	19	20	21	22	23	24
		Peat Decomposers	Non-Peat Det Decomposer	N-fix & Nitrifying Moner	Peat-Forming Macrophytes	Nonpeat-Forming Macrophyt	Algae	Herbivorous Microinv	Saporovorous Microinv	Predaceous Microinv	Algae-Eating Macroinv	Macrophyte-Eating Macroin	Saprovorous Macroinv	Microinv-Eating Macroinv	Macroinv-Eating Macroinv	Algae-Eating Verts	Macrophyte-Eating Verts	Saprovorous Verts	Microinv -Eating Verts	Macroinv -Eating Verts	Vert -Eating Verts	Vert -Eating Macroinv	Superficial Peat	Non-Peat Detritus	Nutrients	Exports	Respirations
1	Peat Decomposers			1.00E+00					2.32E+01				1.61E+01											7.00E+00	1.82E+00		9.94E+00
2	Non-Peat Det Decomposer			2.00E+01					2.32E+01				3.36E+02					1.98E-01						1.37E+02	3.40E-01		2.10E+02
3	N-fix & Nitrifying Moner							3.83E+00			6.35E+00													2.60E+00	6.16E+01		8.54E+02
4	Peat-Forming Macrophytes			2.54E+02													9.00E-03						4.70E+02		5.59E-01		2.46E+02
5	Nonpeat-Forming Macrophy			4.73E+02	9.70E+02							4.88E+01					8.20E-02							6.89E+02	3.73E-01		1.30E+02
6	Algae			2.71E-01				3.83E+01			5.72E+01					2.06E+00								3.80E+01	1.34E+01		5.82E+01
7	Herbivorous Microinv			6.00E-03		1.00E-03				4.61E+00				4.07E+00					7.94E-01					3.27E+01			7.00E-03
8	Saporovorous Microinv			1.40E-02		1.00E-03				1.16E+01				1.02E+01					1.99E+00					6.90E+01			1.90E-02
9	Predaceous Microinv			5.00E-03		1.00E-03								3.03E+00					5.91E-01					1.25E+01			3.20E-02
10	Algae-Eating Macroinv			6.67E+00											6.30E-01					6.40E-01				4.60E+01			9.53E+00
11	Macrophyte-Eating Macroi			5.12E+00											3.40E-01					6.40E-01				3.54E+01			7.31E+00
12	Saprovorous Macroinv			1.13E+02											1.26E+01					5.12E+00				2.93E+03			5.49E+02
13	Microinv-Eating Macroinv			8.23E-01											2.00E+00					2.91E+00				8.66E-01			1.28E+01
14	Macroinv-Eating Macroinv			6.60E-01										2.00E+00						8.74E+00				6.95E-01			3.80E+00
15	Algae-Eating Verts			1.05E-01																3.60E-02	1.00E-03	1.00E-02		1.87E+00			5.79E-02
16	Macrophyte-Eating Verts			1.90E-02																	5.00E-03		9.00E-03	3.30E-02			2.73E-02
17	Saprovorous Verts			1.79E-01																6.20E-02	2.00E-03	1.80E-02		1.64E+00			9.59E-02
18	Microinv -Eating Verts			2.04E+00																7.15E-01	5.30E-01	2.80E-02		1.01E+00			1.44E+00
19	Macroinv -Eating Verts			3.04E+00												1.80E-02		1.80E-02	2.38E+00		3.17E+00	3.44E+00		6.50E+00			3.90E+00
20	Vert -Eating Verts			1.14E+00																		1.04E+00		9.32E-01			6.02E-01
21	Vert -Eating Macroinv			5.80E-02											4.00E-01					3.61E+00				6.10E-02			4.05E-01
22	Superficial Peat	1.41E+01																							5.95E+01		4.36E+02
23	Non-Peat Detritus		6.94E+02						4.64E+01				3.26E+03					1.78E+00							1.10E+01
24	Nutrients	4.50E+01	3.00E+01	3.00E+00	5.59E-01	9.63E+00	1.94E+01																4.00E+01	1.00E+00
25	Imports			4.41E+01		2.30E+03	1.88E+02										1.76E-03
26	Biomasses	1.86E+00	3.00E+00	1.18E+02	6.64E+01	2.22E+01	1.56E-02	3.92E-02	1.16E-02	1.74E+01	1.74E+01	1.34E+01	4.20E+01	2.89E+00	1.49E+00	7.47E-03	1.76E-03	7.30E-03	8.28E-01	2.48E+00	8.00E-03	1.31E-01	1.25E+04	1.39E+03	1.86E+00
Swartkops aggregate netwrk: Biom mgC/m2; flows mgC/m2/day.
No of Compartments	15
No of Living Compartments	12
		1	2	3	4	5	6	7	8	9	10	11	12	13	14	15
		pelagic producers	benthic producers	pelagic bacteria	micro-zooplankton	meso-zooplankton	benthic suspension feeder	meiofauna	deposit feeders	benthic feeding fish	planktivorous fish	carnivorous fish	birds	DOC	suspended POC	sediment POC	Exports	Respirations
1	pelagic producers					5.13E+01	2.04E+02				3.00E-01			6.37E+01				1.89E+02
2	benthic producers							3.21E+02	5.53E+01	7.95E+01						1.08E+03		4.16E+02
3	pelagic bacteria				9.00E-01										1.00E-01			8.00E-01
4	micro-zooplankton				4.00E-01	1.00E-01					1.00E-01				1.00E-01			6.00E-01
5	meso-zooplankton										2.60E+01				2.60E+01		6.00E+00	4.50E+01
6	benthic suspension feede									1.67E+01			1.78E+01			5.10E+02	7.10E+00	5.33E+02
7	meiofauna															1.81E+02		1.41E+02
8	deposit feeders												6.00E-01			6.71E+01		1.40E+02
9	benthic feeding fish											1.40E+00				5.40E+01	9.20E+00	3.16E+01
10	planktivorous fish											3.00E+00	1.90E+00		8.00E-01	2.90E+00	2.00E-01	1.76E+01
11	carnivorous fish															2.20E+00	6.00E-01	1.60E+00
12	birds															4.10E+00	2.00E-01	1.60E+01
13	DOC			1.80E+00													6.19E+01
14	suspended POC					5.16E+01	8.81E+02								1.40E-01		3.00E-01	1.00E-01
15	sediment POC							1.30E+00	1.53E+02						4.35E+02	6.15E+03		1.93E+03
16	Imports	5.08E+02	1.96E+03												4.71E+02	6.09E+02
17	Biomasses	3.73E+03	3.18E+05	3.00E-01	9.00E-01	2.20E+02	4.55E+04	1.40E+03	6.65E+03	1.55E+04	5.90E+03	8.00E+02	8.00E+01	2.70E+03	3.16E+04	1.58E+06
14 Comp. Agg. Flow Model; Ythan Estuary. Biom. mgC/m2; Flows mgC/m2/d
No of Compartments	14
No of Living Compartments	11
		1	2	3	4	5	6	7	8	9	10	11	12	13	14
		Pelagic producers	benthic producers	Pelagic Bacteria	Microzooplankton	Mesozooplankton	Invert Susp Feeders	Meiofauna	Invert deposit feeders	Herbivorous birds	Fish	Carnivorous birds	DOC	Suspended POC	Sediment POC	Exports	Respirations
1	Pelagic producers				2.47E+01	1.70E+00	2.71E+01						4.22E+01	1.78E+02			1.69E+02
2	benthic producers							9.30E+00	5.40E+01	2.19E+01					1.10E+03	2.74E+02	4.56E+02
3	Pelagic Bacteria				2.91E+01									2.20E+00			2.69E+01
4	Microzooplankton				1.16E+01	1.70E+00								2.38E+01			2.82E+01
5	Mesozooplankton										9.00E-01			4.60E+00		1.40E+00	4.60E+00
6	Invert Susp Feeders										3.00E-01	2.19E+01			5.34E+01		1.04E+02
7	Meiofauna														1.01E+02		8.80E+01
8	Invert deposit feeders								3.80E+00		2.27E+01	2.55E+01			7.26E+02		3.16E+02
9	Herbivorous birds														7.70E+00	4.00E-01	1.38E+01
10	Fish											1.40E+00			7.10E+00	3.00E-01	1.52E+01
11	Carnivorous birds														9.80E+00	8.00E-01	3.82E+01
12	DOC			5.82E+01
13	Suspended POC					8.10E+00	1.53E+02							1.18E+01	5.48E+01	1.47E+02	5.30E+00
14	Sediment POC							1.79E+02	1.04E+03					1.10E+02	3.92E+02	5.74E+02	1.56E+02
15	Imports	4.43E+02	1.91E+03										1.60E+01	4.93E+01
16	Biomasses	7.50E+02	9.65E+04	1.30E+02	1.35E+02	1.19E+02	1.11E+04	2.05E+03	1.51E+04	3.70E+01	5.00E+03	2.01E+02	2.60E+04	4.28E+03	6.08E+05
Twin Cays Network; Fringe-Carbon; last updated October 2005
No of Compartments	87
No of Living Compartments	72
		1	2	3	4	5	6	7	8	9	10	11	12	13	14	15	16	17	18	19	20	21	22	23	24	25	26	27	28	29	30	31	32	33	34	35	36	37	38	39	40	41	42	43	44	45	46	47	48
		Rhizophora mangle	Avicennia marina	Laguncularia racemosa	Lichen	Macroalgae - submerged	Macroalgae - Bostrychia	Microbial Mats	Heterotrophic Microfauna	Crabs - Uca spp	Crabs - Ucides	Crabs - Goniopsis	Arboreal Crabs - Aratus	Cerithidea sp	Littorina angulifera	Melampus coffeus	Litter Harpacticoid Cope	Litter Copepods	Litter Amphipods	Litter Tanaidacea	Litter Isopod	Litter Ostracoda	Litter Gastropoda	Litter Polychaeta	Litter Oligochaeta	Litter Nematoda	Litter Flatworms	Litter Mites	Hydroids	Serpulids	Tunicates	Sponges	Seaslugs	Sea urchins	Wood-boring isopods	Leptostraca	R mangle leaf miners Ma	R mangle stem miners Ma	R mangle stem girdlers	R mangle twig borers	Inquilines - R mangle (	A marina leaf miners	A marina stem miners	A marina stem girdlers	A marina twig borers	Inquilines A marina (ex	L racemosa leaf miners	L racemosa stem miners	L racemosa stem girdler
1	Rhizophora mangle										4.08E-07	2.69E-05	9.26E-05		2.65E-07																	2.82E-06			4.30E-07		9.99E-08	1.02E-07	8.87E-07	9.30E-06	5.64E-07					7.05E-11
2	Avicennia marina										4.05E-07	2.67E-05	9.18E-05																												5.59E-07	3.57E-11	3.62E-11	1.60E-10	1.68E-09	6.99E-11
3	Laguncularia racemosa										4.05E-07	2.67E-05	9.19E-05																												5.60E-07					7.00E-11	1.06E-10	1.08E-10	4.71E-10
4	Lichen														2.63E-03																										5.59E-03					6.99E-07
5	Macroalgae - submerged																																1.55E-03	7.54E-01
6	Macroalgae - Bostrychia
7	Microbial Mats									3.30E-04			9.00E-05	2.58E-11	2.58E-07	3.25E-10	8.89E-09	2.55E-10	7.35E-08	3.15E-08	4.06E-08	3.67E-10	2.18E-06	6.40E-08	3.24E-09	1.67E-08	1.95E-13
8	Heterotrophic Microfauna								3.81E-01	1.28E-01											5.56E-06			8.76E-06		2.28E-06		2.91E-06
9	Crabs - Uca spp
10	Crabs - Ucides
11	Crabs - Goniopsis
12	Arboreal Crabs - Aratus
13	Cerithidea sp
14	Littorina angulifera
15	Melampus coffeus
16	Litter Harpacticoid Cope																											2.92E-07
17	Litter Copepods
18	Litter Amphipods
19	Litter Tanaidacea
20	Litter Isopod
21	Litter Ostracoda
22	Litter Gastropoda
23	Litter Polychaeta																							2.23E-06
24	Litter Oligochaeta
25	Litter Nematoda																							1.06E-06		1.05E-06	1.22E-11
26	Litter Flatworms																							2.97E-12		1.98E-12
27	Litter Mites																											2.38E-07
28	Hydroids
29	Serpulids
30	Tunicates
31	Sponges
32	Seaslugs
33	Sea urchins
34	Wood-boring isopods
35	Leptostraca
36	R mangle leaf miners Ma												4.66E-11
37	R mangle stem miners Ma												1.06E-10
38	R mangle stem girdlers												1.25E-09																												1.25E-09
39	R mangle twig borers												2.40E-08																												3.39E-09
40	Inquilines - R mangle (																																								9.16E-05					1.15E-08
41	A marina leaf miners												5.99E-14
42	A marina stem miners												1.37E-13
43	A marina stem girdlers												6.74E-13																																	6.74E-13
44	A marina twig borers												8.62E-12																																	7.97E-13
45	Inquilines A marina (ex																																								1.44E-08					7.35E-09
46	L racemosa leaf miners												1.98E-13																																	1.98E-13
47	L racemosa stem miners												6.35E-13
48	L racemosa stem girdler												2.97E-12
49	L racemosa twig borers												4.61E-11
50	Inquilines L racemosa (																																								5.39E-08					8.43E-09
51	Ants																																								1.01E-04					1.26E-08
52	Other Arthropods																																								1.11E-04					1.39E-08
53	Reptiles - Anolis
54	Reptiles - Gecko
55	Reptiles - Boa
56	Reptiles - Crocodile
57	Birds - Piscivores+Pirat
58	Birds - Pisc+Rep+Inv
59	Birds - Inv+Veg
60	Birds - Aquat Insect+In
61	Birds - Nectarivores
62	Birds - Raptors
63	Birds - Frugivores
64	Birds - Omnivores
65	Birds - Insectivores
66	Birds - Insect+Frug
67	Sediment Bacteria								4.71E-01	9.62E-02	4.09E-05	2.70E-03	9.29E-03	2.67E-09	2.66E-05	3.35E-08	9.17E-07	2.63E-08	7.58E-06	3.25E-06	4.19E-06	3.78E-08	2.25E-04	6.58E-06	3.34E-07	1.72E-06	2.01E-11														5.65E-05					7.07E-09
68	Sediment Fungi								6.24E-01	1.27E-01	5.42E-05	3.57E-03	1.20E-02	3.53E-09	3.52E-05	4.44E-08	1.21E-06	3.48E-08	1.00E-05	4.30E-06	5.55E-06	5.00E-08	2.97E-04	8.71E-06	4.42E-07	2.28E-06	2.66E-11														7.48E-05					9.36E-09
69	Leaf litter Bacteria + F								1.16E-07		1.16E-07	1.16E-07				4.37E-09	1.16E-07	3.43E-09	1.16E-07	1.16E-07	1.16E-07	4.93E-09	1.16E-07	1.16E-07	4.36E-08	1.16E-07	2.62E-12
70	Dead Wood Fungi + Bacter																																		3.41E-07						3.41E-07					1.52E-09
71	Live Wood Fungi + Bacter																																						2.61E-11	2.61E-11	2.61E-11			1.17E-12	1.22E-11	5.09E-13			3.43E-12
72	Green leaf Fungi + Bacte												3.01E-11		3.01E-11																										3.01E-11					4.78E-13
73	R mangle - Dead Root
74	A marina - Dead Root
75	L racemosa - Dead Root
76	R mangle - Leaf Litter										2.41E-10	1.59E-08				1.98E-13			4.47E-11
77	A marina - Leaf Litter										8.46E-08	5.59E-06				6.94E-11			1.57E-08
78	L racemosa - Leaf Litte										6.25E-08	4.13E-06				5.13E-11			1.16E-08
79	Thalassia Litter																		7.46E-04
80	Dead wood - R mangle																																								3.36E-11
81	Dead wood - A marina																																													7.02E-11
82	Dead wood - L racemosa
83	Imported dead wood
84	Detritus = Surface muck								9.05E-01	1.85E-01	7.86E-05	5.19E-03	1.74E-02	5.12E-09	5.11E-05	6.44E-08	1.71E-06	5.05E-08	1.46E-05	6.19E-06	8.05E-06	7.26E-08	4.32E-04	1.26E-05	6.42E-07	3.31E-06	3.43E-11														1.09E-04					1.36E-08
85	POC (0-30 cm)								4.64E+01
86	DOC (0-30 cm)								4.66E-03
87	DIC (0-30 cm)							1.34E-04
88	Imports	3.22E+03	1.28E+02	1.46E+02	3.10E-01	1.40E+02	3.25E+02	1.18E+01																					8.24E-03	8.01E-04	3.75E-01	5.43E-01		1.19E+00		1.37E-01
89	Biomasses	1.03E+04	3.21E+02	3.64E+02	8.45E-02	3.19E+01	1.09E+01	3.85E+01	5.39E-01	9.89E-01	6.58E-03	4.39E-01	2.71E-01	7.87E-08	1.17E-03	1.97E-06	3.89E-05	1.11E-06	1.10E-03	1.18E-04	4.04E-04	1.60E-06	3.50E-03	1.02E-03	4.36E-05	1.15E-03	2.11E-08	3.48E-05	4.34E-02	4.46E-05	2.09E-02	3.18E-02	5.57E-05	1.37E+00	8.17E-04	1.17E-02	2.77E-04	2.81E-04	2.46E-03	2.58E-02	1.94E-02	1.01E-07	1.02E-07	8.96E-07	9.39E-06	3.54E-06	2.97E-07	3.01E-07	2.63E-06
Twin Cays Network; Transition-Carbon; last updated October 2005
No of Compartments	74
No of Living Compartments	58
		1	2	3	4	5	6	7	8	9	10	11	12	13	14	15	16	17	18	19	20	21	22	23	24	25	26	27	28	29	30	31	32	33	34	35	36	37	38	39	40	41	42	43	44	45	46	47	48
		Rhizophora mangle	Avicennia marina	Laguncularia racemosa	Lichen	Understory (e g Batis)	Macroalgae - Bostrychia	Microbial Mats	Heterotrophic Microfauna	Crabs - Uca spp	Crabs - Ucides	Crabs - Goniopsis	Arboreal Crabs - Aratus	Cerithidea	Littorina angulifera	Melampus coffeus	Litter Harpacticoid Cope	Litter Copepods	Litter Amphipods (Others	Litter Tanaidacea	Litter Isopod	Litter Ostracoda	Litter Gastropoda	Litter Polychaeta	Litter Oligochaeta	Litter Nematoda	Litter Flatworms	Litter Mites	R mangle leaf miners Ma	R mangle stem miners Ma	R mangle stem girdlers	R mangle twig borers	Inquilines - R mangle (	A marina leaf miners	A marina stem miners	A marina stem girdlers	A marina twig borers	Inquilines A marina (ex	L racemosa leaf miners	L racemosa stem miners	L racemosa stem girdler	L racemosa twig borers	Inquilines L racemosa (	Insects - Ants	Other Arthropods	Reptiles - Anolis	Reptiles - Gecko	Reptiles - Boa	Birds - Nectarivores
1	Rhizophora mangle										5.56E-05	6.75E-06	1.27E-05		3.32E-10														1.29E-07	2.25E-08	1.23E-06	6.75E-06	1.60E-07					4.93E-10					5.78E-10						2.67E-10
2	Avicennia marina										5.55E-05	6.75E-06	1.27E-05																				1.60E-07	6.82E-10	1.14E-10	4.99E-09	3.42E-08	4.93E-10					5.78E-10						2.66E-10
3	Laguncularia racemosa										5.55E-05	6.75E-06	1.27E-05																				1.60E-07					4.93E-10	7.10E-10	1.19E-10	5.26E-09	3.57E-08	5.78E-10						2.66E-10
4	Lichen														3.32E-06																		1.61E-03					4.94E-06					5.79E-06	1.40E-03	1.02E-02
5	Understory (e g Batis)
6	Macroalgae - Bostrychia
7	Microbial Mats									1.85E-04			1.27E-05	4.36E-11	3.31E-10	2.83E-07	3.39E-08	2.95E-09	5.51E-09	1.61E-07	3.99E-09	2.05E-09	2.22E-07	2.62E-07	1.71E-09	1.76E-10	5.98E-13
8	Heterotrophic Microfauna								1.21E-01	1.21E-01											4.02E-07			2.64E-05		1.77E-08		5.29E-07
9	Crabs - Uca spp																																													7.74E-04	1.33E-03
10	Crabs - Ucides
11	Crabs - Goniopsis
12	Arboreal Crabs - Aratus																																													3.27E-04	3.76E-04
13	Cerithidea
14	Littorina angulifera
15	Melampus coffeus
16	Litter Harpacticoid Cope																											1.54E-07
17	Litter Copepods
18	Litter Amphipods (Others
19	Litter Tanaidacea
20	Litter Isopod
21	Litter Ostracoda
22	Litter Gastropoda
23	Litter Polychaeta																							1.19E-05
24	Litter Oligochaeta
25	Litter Nematoda																							7.53E-09		5.11E-09	1.74E-11
26	Litter Flatworms																							1.33E-11		1.33E-11
27	Litter Mites																											9.86E-08
28	R mangle leaf miners Ma												4.66E-10
29	R mangle stem miners Ma												7.32E-11
30	R mangle stem girdlers												6.01E-09																				1.98E-09
31	R mangle twig borers												4.18E-08																				2.23E-09
32	Inquilines - R mangle (																																1.89E-05					5.81E-08					6.81E-08			5.80E-05	5.80E-05
33	A marina leaf miners												1.62E-12
34	A marina stem miners												3.21E-13
35	A marina stem girdlers												1.83E-11																									1.08E-11
36	A marina twig borers												1.60E-10																									1.09E-11
37	Inquilines A marina (ex																																8.48E-08					4.07E-08					4.77E-08			8.48E-08	8.48E-08
38	L racemosa leaf miners												1.89E-12																									1.88E-12					1.88E-12
39	L racemosa stem miners												5.23E-13
40	L racemosa stem girdler												2.67E-11
41	L racemosa twig borers												2.37E-10
42	Inquilines L racemosa (																																1.00E-07					4.58E-08					5.37E-08			1.00E-07	1.00E-07
43	Insects - Ants																																3.14E-05					9.66E-08					1.13E-07		4.24E-05	4.24E-05	4.24E-05		5.22E-08
44	Other Arthropods																																2.41E-05					7.41E-08					8.69E-08	2.10E-05	1.68E-04	3.28E-04	3.28E-04		4.00E-08
45	Reptiles - Anolis																																													5.44E-04		2.91E-06
46	Reptiles - Gecko																																															2.98E-06
47	Reptiles - Boa
48	Birds - Nectarivores
49	Birds - Frugivores
50	Birds - Omnivores
51	Birds - Insectivores																																													1.68E-07	1.68E-07	1.68E-07
52	Birds - Insect+Frug																																													8.49E-08	8.49E-08	8.49E-08
53	Sediment Bacteria								1.28E-01	1.34E-01	2.38E-03	2.89E-04	5.44E-04	1.88E-09	1.42E-08	1.22E-05	1.45E-06	1.27E-07	2.37E-07	6.89E-06	1.72E-07	8.80E-08	9.53E-06	1.13E-05	7.36E-08	7.54E-09	2.57E-11						6.86E-06					2.11E-08					2.48E-08	5.99E-06	4.78E-05
54	Sediment Fungi								1.90E-01	2.00E-01	3.55E-03	4.31E-04	8.12E-04	2.80E-09	2.12E-08	1.81E-05	2.16E-06	1.89E-07	3.53E-07	1.03E-05	2.56E-07	1.31E-07	1.42E-05	1.68E-05	1.10E-07	1.12E-08	3.83E-11						1.02E-05					3.15E-08					3.69E-08	8.93E-06	7.13E-05
55	Leaf litter Bacteria + F								5.25E-09		5.25E-09	5.25E-09				5.25E-09	5.25E-09	5.25E-09	5.25E-09	5.25E-09	5.25E-09	5.25E-09	5.25E-09	5.25E-09	5.25E-09	5.54E-10	9.44E-13																		5.25E-09
56	Dead Wood Fungi + Bacter																																4.83E-08					5.91E-09					6.93E-09	4.83E-08	4.83E-08
57	Live Wood Fungi + Bacter																														2.05E-11	2.05E-11	2.05E-11			2.05E-11	2.05E-11	6.43E-12			2.05E-11	2.05E-11	7.53E-12	2.05E-11	2.05E-11
58	Green leaf Fungi + Bacte												3.97E-11		4.28E-12																		3.97E-11					6.36E-12					7.45E-12	3.97E-11	3.97E-11
59	R mangle - Dead Root
60	A marina - Dead Root
61	L racemosa - Dead Root
62	R mangle - Leaf Litter										3.29E-06	4.00E-07				1.68E-08			3.28E-10																									8.28E-09	6.61E-08
63	A marina - Leaf Litter										5.04E-06	6.13E-07				2.58E-08			5.02E-10																									1.27E-08	1.01E-07
64	L racemosa - Leaf Litte										8.16E-06	1.13E-06				4.76E-08			9.28E-10																									2.34E-08	1.87E-07
65	Thalassia Litter																		1.60E-05
66	Dead wood - R mangle																																3.88E-10
67	Dead wood - A marina																																					5.44E-12
68	Dead wood - L racemosa																																										6.91E-12
69	Imported dead wood
70	Dead Batis maritima
71	Detritus = Surface muck								2.43E+00	2.56E+00	3.98E-02	5.51E-03	1.04E-02	3.55E-08	2.71E-07	2.32E-04	2.76E-05	2.42E-06	4.52E-06	1.31E-04	3.27E-06	1.68E-06	1.82E-04	2.15E-04	1.40E-06	1.44E-07	2.45E-10						1.31E-04					4.03E-07					4.72E-07	1.14E-04	9.11E-04
72	POC (0-30 cm)								4.25E+01
73	DOC (0-30 cm)
74	DIC (0-30 cm)							6.24E-05
75	Imports	4.56E+02	3.32E+03	1.32E+03	7.49E-02	3.62E+01	6.42E+01	5.98E+00
76	Biomasses	1.21E+03	2.47E+03	9.93E+02	2.04E-02	2.28E+00	4.33E+00	1.85E+01	2.70E-01	2.51E+00	8.78E-01	1.10E-01	3.86E-02	1.35E-07	1.74E-06	1.52E-03	1.18E-04	1.16E-05	8.56E-05	5.44E-04	4.04E-05	8.45E-06	3.48E-04	4.15E-03	2.26E-05	1.27E-05	3.32E-08	1.38E-05	3.60E-04	6.30E-05	3.44E-03	1.88E-02	6.13E-03	2.95E-06	5.16E-07	2.82E-05	1.54E-04	2.51E-05	3.07E-06	5.37E-07	2.94E-05	1.60E-04	2.61E-05	3.09E-03	2.45E-02	6.92E-02	6.92E-02	8.80E-02	5.62E-05
Broad Creek May 2001 (Egnotovich)
No of Compartments	36
No of Living Compartments	31
		1	2	3	4	5	6	7	8	9	10	11	12	13	14	15	16	17	18	19	20	21	22	23	24	25	26	27	28	29	30	31	32	33	34	35	36
		Benthic Algae	Picophytoplankton	Phytoplankton	Low Marsh Root	High Marsh Root	Nuphar lutea	Zizania aquatica	Acorus calamus	Polygonum arifolium	Leerzia oryzoides	Peltandra virginica	Impatiens capensis	Schoenoplectus fluviatili	Other Macrophytes	Microzooplankton	Mesozooplaknton	Meiofauna	Macrobenthos	Corbicula fluminea	Corixidae	Gammarus sp	Odonate larvae	Other insects	Anguilla rostrata	Notropis hudsonius	Fundulus diaphanus < 35	Fundulus diaphanus >35	Fundulus heteroclitus	Gambusia holbrooki	Morone americana	Etheostoma olmstedi	Macrophyte Detritus	POC	DOC	High Marsh Soil	Low Marsh Soil	Exports	Respirations
1	Benthic Algae																	5.32E-01	8.15E-01	1.24E-03	1.28E-02	6.60E-03		2.06E-03					4.26E-01			3.30E-03		4.17E+00
2	Picophytoplankton															1.17E+00				1.86E-03	1.93E-02													6.28E+00
3	Phytoplankton															2.32E+00	1.23E-01			3.70E-03	3.82E-02			6.17E-03										1.25E+01
4	Low Marsh Root
5	High Marsh Root
6	Nuphar lutea																																1.59E+02		1.60E+02
7	Zizania aquatica																																2.85E-01		2.85E-01
8	Acorus calamus																																2.08E+02		2.09E+02
9	Polygonum arifolium																																3.36E+01		3.37E+01
10	Leerzia oryzoides																																4.25E+00		4.28E+00
11	Peltandra virginica																																4.49E+01		4.51E+01
12	Impatiens capensis																																3.24E+01		3.25E+01
13	Schoenoplectus fluviatil																																2.35E+01		2.36E+01
14	Other Macrophytes																																2.93E+00		2.94E+00
15	Microzooplankton																			6.43E-03	6.65E-02			1.07E-02										5.96E+00					6.04E+00
16	Mesozooplaknton																			8.71E-03	5.52E-02		5.23E-02	1.45E-02	5.23E-02	5.23E-02								5.23E-02					2.89E-01
17	Meiofauna																		4.38E+01	2.04E-01	2.11E+00	1.09E+00		3.41E-01	5.65E+00											4.37E+01	4.37E+01		1.23E+02
18	Macrobenthos																						1.07E+00	2.67E-01	4.38E+00		3.69E+01	3.68E+01	3.68E+01	1.07E-01	3.68E+01	4.27E-01		3.68E+01		3.68E+01	3.68E+01		1.92E+02
19	Corbicula fluminea																									2.39E-02	2.39E-02	2.39E-02	2.39E-02		2.39E-02			1.19E-02					1.04E-01
20	Corixidae																											1.09E+00	1.09E+00	6.58E-02	1.09E+00			1.05E+00					4.39E+00
21	Gammarus sp																									1.24E-01		1.24E-01	1.24E-01		9.95E-02			9.95E-02					5.93E-01
22	Odonate larvae																														3.24E-01			2.95E-01					5.02E-01
23	Other insects																										1.73E-01	1.73E-01	1.38E-01	6.91E-02	1.38E-01	1.38E-01							6.46E-01
24	Anguilla rostrata																																	5.64E+00					4.45E+00
25	Notropis hudsonius																																	3.97E-01					3.16E-01
26	Fundulus diaphanus < 35																																	2.76E+01					2.17E+01
27	Fundulus diaphanus >35																																	2.66E+01					2.09E+01
28	Fundulus heteroclitus																																	2.43E+01					1.91E+01
29	Gambusia holbrooki																																	1.34E-01					1.13E-01
30	Morone americana																																	2.15E+01					1.69E+01
31	Etheostoma olmstedi																																	3.30E-01					2.71E-01
32	Macrophyte Detritus																																	2.69E+01	2.69E+01	2.69E+01		4.28E+02
33	POC															8.60E+00	4.53E-01		9.04E+00	9.16E-03	1.42E-01	6.87E-02		1.83E-02		5.13E-01	1.22E+01	9.34E+00	4.73E+00	4.58E-03		3.20E-02			1.36E+01	2.31E+01	2.61E+01	9.46E+01
34	DOC																																			2.05E+02	2.31E+02	1.18E+02
35	High Marsh Soil																	1.31E+02	2.01E+02		3.15E+00			4.07E-01
36	Low Marsh Soil																	1.32E+02	2.02E+02		3.17E+00			4.09E-01
37	Imports	5.97E+00	7.47E+00	1.50E+01	1.20E+02	5.51E+02	3.20E+02	5.70E-01	4.17E+02	6.73E+01	8.53E+00	9.00E+01	6.49E+01	4.71E+01	5.87E+00																			1.87E+00	1.31E+00
38	Biomasses	6.53E-02	2.00E-02	1.64E-01	4.47E+01	3.18E+02	5.19E+01	6.17E-02	6.77E+01	7.28E+00	9.23E-01	9.74E+00	7.02E+00	5.09E+00	6.35E-01	1.95E-02	1.75E-03	2.49E-02	1.82E-01	7.25E-04	4.93E-03	7.85E-04	8.65E-04	1.58E-03	7.09E-03	3.42E-03	9.03E-02	7.89E-02	1.01E-01	1.58E-04	5.90E-02	7.89E-04	8.41E+00	3.74E-01	1.19E+00	2.98E+03	2.77E+03
Northern Benguela Upwelling Ecosystem; J.J. Heymans mgC/m2/y (?)
No of Compartments	24
No of Living Compartments	22
		1	2	3	4	5	6	7	8	9	10	11	12	13	14	15	16	17	18	19	20	21	22	23	24
		Phytoplankton	Bacteria	H M Flagellates	Microzooplankton	Mesozooplankton	Macrozooplankton	Ichthyofauna	Anchovy	Pilchard	Lanternfish	Gobies	Horse Mackerel	Hake	Carnivorous Fish	B Feeding Fish	Snoek	Deep Sea Crabs	Squid	Jellyfish	Rock Lobster	Seals	Birds	DOC	Suspended POC	Exports	Respirations
1	Phytoplankton					3.02E+02	4.17E+01	5.00E-04	1.20E+00	5.40E+00		5.30E+00								1.12E+02				2.96E+02	4.21E+02		1.63E+02
2	Bacteria			2.78E+02																				1.37E+02	6.75E+02		2.84E+02
3	H M Flagellates				1.11E+02																				9.23E+01		7.43E+01
4	Microzooplankton					6.34E+01			4.00E-01	1.90E+00										6.90E+00					3.84E+01		9.07E+01
5	Mesozooplankton						2.78E+01		3.20E+00	4.70E+00	4.20E+00		2.05E+01	3.70E+00	2.00E+00					1.04E+01			1.00E-03		7.29E+01	3.30E+01	1.83E+02
6	Macrozooplankton								3.20E+00	4.70E+00	6.40E+00	6.00E-01	5.30E+00	1.00E+00	5.00E-01		1.20E+00		2.47E+00	2.70E+00			1.00E-02		6.25E+00	3.90E-01	3.48E+01
7	Ichthyofauna																			1.00E-04					3.00E-04		1.00E-04
8	Anchovy													3.00E-02	1.00E-02		4.00E-02					2.80E-01	6.00E-02		5.52E+00	4.00E-01	1.76E+00
9	Pilchard													6.00E-02	3.00E-02		7.00E-02					5.80E-01	3.00E-03		5.78E+00	9.30E-01	9.32E+00
10	Lanternfish												2.00E-01	4.00E-02	2.00E-02		5.00E-02		9.00E-02			3.60E-01	1.00E-02		4.92E+00	2.80E-01	4.61E+00
11	Gobies													2.00E-02	1.00E-02		3.00E-02					2.00E-01	1.20E-01		3.24E+00	2.10E-01	2.01E+00
12	Horse Mackerel													9.00E-02	5.00E-02		1.10E-01					8.90E-01	1.00E-03		1.41E+01	1.47E+00	9.29E+00
13	Hake													2.00E-02	1.00E-02		2.00E-02		4.00E-02			1.50E-01	3.00E-02		4.66E+00	1.80E-01	3.80E-01
14	Carnivorous Fish													1.00E-02	4.00E-03		1.00E-02		2.00E-02			7.00E-02	1.00E-02		2.29E+00	9.00E-02	1.90E-01
15	B Feeding Fish													4.00E-03	2.00E-03		5.00E-03		1.00E-02			4.20E-02			1.29E+00	6.10E-02	1.00E-01
16	Snoek																					1.00E-02	1.00E-03		3.10E-01	2.20E-02	1.25E+00
17	Deep Sea Crabs													3.00E-03	2.00E-03		4.00E-03								1.00E-02	9.40E-02	2.20E-01
18	Squid													1.00E-02	1.00E-03		1.00E-02		2.00E-02			9.00E-02	1.00E-02		8.10E-01	1.20E-01	1.57E+00
19	Jellyfish													5.00E-01						1.40E+00				9.00E+00	3.50E+01	3.81E+00	8.39E+01
20	Rock Lobster																								3.00E-03	5.00E-04	5.00E-04
21	Seals																						4.00E-04		1.39E+00	4.00E-03	1.29E+00
22	Birds																						3.00E-04		7.00E-02		1.90E-01
23	DOC		1.38E+03
24	Suspended POC				9.04E+01																					1.30E+03
25	Imports	1.35E+03														1.52E+00		3.40E-01			4.00E-03			9.32E+02
26	Biomasses	1.43E+04	2.50E+03	1.65E+03	9.00E+01	1.00E+03	8.00E+02	2.00E-01	1.18E+02	2.55E+02	5.59E+02	4.19E+02	1.12E+03	4.57E+02	2.25E+02	1.27E+02	5.91E+01	1.44E+01	1.10E+01	5.95E+02	6.00E-01	4.71E+01	1.00E+00	2.06E+05	8.81E+03
Delaware Bay 1/17/94 final data except poc bacteria; (mg/c/m2/year)
No of Compartments	34
No of Living Compartments	33
		1	2	3	4	5	6	7	8	9	10	11	12	13	14	15	16	17	18	19	20	21	22	23	24	25	26	27	28	29	30	31	32	33	34
		SHARKS	BLUEFISH	STRIPED BASS	WEAKFISH	SPOT	WINDOWPAN FLOUD	HOGCHOAKER	SUMMER FLOUNDER	SKATES	AMERICAN SHAD	RIVER HERRINGS	FUNDULUS SP	BAY ANCHOVY	MENIDIA SP	ATL MENHADEN	BLUE CRAB	HORSESHOE CRABS	CRABS (BRACHN)	HARD CLAM	AM OYSTER	PELECYPODS	MACROFAUNA	SHRIMP(CRG PAL)	MYCID SHRIMP	MEIOFAUNA	SEA NETTLE	CTENOPHORES	FISH/CRAB LARVA	MESOZOOPLANKTON	MICROZOOPLANKTN	HETERO MICFLAGE	FREE BACTERIA	PELG PHYTOPLANK	Detritus	Exports	Respirations
1	SHARKS																																		2.05E+00	1.00E+00	7.11E+00
2	BLUEFISH		4.36E+00																																1.84E+01	2.53E+01	3.91E+01
3	STRIPED BASS	5.08E-01																																	2.11E+00	2.35E-01	5.15E+00
4	WEAKFISH	1.52E+00		8.00E-01	3.96E+01					2.20E+00																									8.65E+01	9.90E+01	1.66E+02
5	SPOT	1.02E+00		1.12E+00																															3.23E+01	8.20E-02	3.74E+01
6	WINDOWPAN FLOUD	1.02E+00																																	1.87E+01	5.00E-03	3.22E+01
7	HOGCHOAKER	1.02E+00																																	1.38E+01	5.00E-03	2.42E+01
8	SUMMER FLOUNDER	5.08E-01																																	8.05E+00	8.44E+00	2.30E+01
9	SKATES	5.08E-01																																	1.27E+01		3.08E+01
10	AMERICAN SHAD																																		3.82E+00	1.67E+00	5.15E+00
11	RIVER HERRINGS		4.36E+00																																3.55E+00	4.20E-02	7.34E+00
12	FUNDULUS SP		8.72E+00	8.00E-01		4.32E+00	2.59E+00		2.00E+00										2.02E+01																2.05E+02		5.18E+02
13	BAY ANCHOVY		8.72E+00	1.60E+00	3.96E+01	3.60E+00	2.59E+00		4.00E+00								4.08E+02		2.02E+01																4.78E+02		1.21E+03
14	MENIDIA SP		2.18E+01	8.00E-01	3.96E+01	4.32E+00	2.59E+00		4.00E+00								4.08E+02		2.02E+01																1.84E+03		5.46E+03
15	ATL MENHADEN		1.74E+01	8.00E-01					4.00E+00																										3.96E+01	8.35E+00	8.58E+01
16	BLUE CRAB	5.08E-01	8.72E+00	1.60E-01																															1.72E+03	8.86E+01	2.26E+03
17	HORSESHOE CRABS	5.08E-01			3.96E+00																														6.46E+01	4.26E-01	2.98E+01
18	CRABS (BRACHN)	5.08E-01	4.36E+00		1.58E+01				4.00E+00	4.40E+00																									2.25E+02		1.50E+02
19	HARD CLAM																																		8.52E-02	1.10E-02	3.11E-01
20	AM OYSTER																																		1.10E+03	1.18E+00	2.35E+03
21	PELECYPODS	5.08E-01		8.00E-02				1.48E+01									1.83E+03	5.95E+01	8.09E+01						5.60E+02										2.76E+03		3.82E+03
22	MACROFAUNA	2.03E+00			1.98E+01	2.95E+01		1.56E+01		1.32E+01					7.80E+02			3.97E+01	8.09E+01																7.26E+04		5.78E+04
23	SHRIMP(CRG PAL)		8.72E+00	9.60E-01	7.92E+01	8.64E+00	1.82E+01	4.68E+00	8.00E+00	8.80E+00			1.52E+02	2.17E+01	1.95E+03		4.08E+02		6.07E+01																4.06E+03		2.91E+03
24	MYCID SHRIMP			8.80E-01	1.58E+02	1.44E+01	2.07E+01	3.90E+00	1.00E+01	1.32E+01	1.06E+00	1.53E+00	1.52E+02	2.61E+02					2.02E+01					5.34E+03											7.07E+03		5.60E+03
25	MEIOFAUNA									2.20E+00			3.81E+01				4.08E+02		4.05E+01					9.70E+02	1.87E+03										8.68E+03		1.05E+04
26	SEA NETTLE																																		2.65E+02		5.90E+02
27	CTENOPHORES																										2.82E+02								4.37E+03		9.06E+03
28	FISH/CRAB LARVA													2.17E+02	3.90E+02																				8.66E+02		2.70E+03
29	MESOZOOPLANKTON					7.20E+00					9.58E+00	1.38E+01	2.74E+02	1.30E+03	2.34E+03	7.00E+00				2.04E-02		9.13E+02	1.31E+04			1.13E+04	5.73E+02	4.12E+03	2.09E+03	6.18E+04					1.14E+05		9.74E+04
30	MICROZOOPLANKTN																			2.04E-02	1.72E+02	4.56E+02	6.57E+03							3.09E+04					2.07E+04		2.18E+04
31	HETERO MICFLAGE																														2.98E+04				2.31E+04		2.53E+04
32	FREE BACTERIA																													6.18E+04		6.26E+04			1.39E+05		9.80E+03
33	PELG PHYTOPLANK												3.81E+01	1.52E+02	7.80E+02	3.12E+01				3.66E-01	3.10E+03	7.76E+03	9.20E+04	4.85E+02	6.72E+03				2.09E+03	1.55E+05	2.98E+04				9.48E+03
34	Detritus						5.19E+00		4.00E+00				1.07E+02	2.17E+02	1.56E+03	4.68E+01	6.11E+02		6.07E+01		1.72E+02		1.97E+04	2.91E+03	9.52E+03	1.13E+04		9.60E+03			2.10E+04	1.56E+04	2.19E+05			1.62E+05
35	Imports																																2.74E+05	3.07E+05	6.03E+04
36	Biomasses	2.03E+00	3.23E+01	2.50E+00	1.32E+02	3.60E+01	2.59E+01	1.95E+01	2.00E+01	8.80E+00	5.60E+00	5.10E+00	7.61E+01	4.83E+02	7.80E+02	9.75E+01	6.68E+02	1.65E+01	5.78E+01	3.70E-02	3.13E+02	8.30E+02	6.57E+03	4.85E+02	9.33E+02	7.50E+02	1.00E+00	5.24E+01	2.78E+02	1.87E+03	4.74E+02	4.60E+01	4.56E+02	3.41E+03	2.48E+05
Lake Michigan Control network; A. Krause & D. Mason; Mich State Univ.
No of Compartments	36
No of Living Compartments	35
		1	2	3	4	5	6	7	8	9	10	11	12	13	14	15	16	17	18	19	20	21	22	23	24	25	26	27	28	29	30	31	32	33	34	35	36
		Flagellates	Blue-greenGree	Diatoms	Rotifers	Cyclopoids	Calanoids	Cladocerans	Leptodora	Bythotrephes	Diporeia	Mysis	Oligoch/Chiron	Sphae/Gast	Zebra mussels	Benthic microin	Other fish	Alewife	Bloater	Rainbow smelt	Slimy sculpin	Deepwater sculp	Lake Whitefish	Yellow perch	Juv Brown trou	Juv Steelhead	Juv Coho	Juv Chinook	Juv Lake Trout	Burbot	Brown trout	Steelhead	Coho	Chinook	Lake trout	Sea lamprey	Detritus	Exports	Respirations
1	Flagellates				3.68E+01	2.20E+02	7.35E+02	1.11E+02			1.26E+02	4.92E+00		7.30E+00			5.49E-01																				1.48E+03
2	Blue-greenGree				1.83E+00	7.53E+00	1.82E+01	3.66E+01			6.23E+01	4.89E+00		7.25E+00			5.45E-01																				7.23E+01
3	Diatoms				5.31E+01	4.50E+02	1.08E+03	5.51E+02			3.75E+02	4.90E+00		7.27E+00			5.40E-01																				5.79E+03
4	Rotifers					3.81E+00																															8.92E+01		9.03E+01
5	Cyclopoids								1.25E+00			2.44E+01					2.72E+00	2.04E+00	1.20E+00	1.85E-01				7.00E-03													2.52E+02		4.73E+02
6	Calanoids								1.19E+00			1.90E+01					2.66E+00	1.19E+01	1.76E+00	3.61E-01				7.00E-03													4.44E+02		1.35E+03
7	Cladocerans								1.22E+00			2.45E+01					7.35E+00	1.22E+01	1.50E+01	1.11E+00			1.37E-01	7.00E-03													3.57E+02		3.17E+02
8	Leptodora																	3.60E-02	5.30E-02					3.00E-03													8.37E-01		2.73E+00
9	Bythotrephes																																					1.00E-08
10	Diporeia																5.46E+00	1.39E+01	3.61E+01	5.57E-01	9.00E-01	1.31E+01	2.06E+00	1.40E-02						1.00E-03							1.31E+02		4.22E+02
11	Mysis																	4.35E-01	6.39E+00	3.94E-01	1.06E-01	2.13E+00								1.00E-03							2.08E+01		6.70E+01
12	Oligoch/Chiron												4.84E+01				2.77E+00					5.09E+00	2.78E-01	1.80E-02													2.07E+02		6.92E+02
13	Sphae/Gast																3.34E+00						3.05E-01														1.37E+01		3.11E+01
14	Zebra mussels																																					1.00E-08
15	Benthic microin										1.25E+01	4.88E+00																									4.87E+01		9.48E+01
16	Other fish																2.43E-01			1.03E+00				1.30E-02	3.00E-03	1.00E-02	3.00E-04	4.20E-02	6.10E-02	4.00E-03	2.90E-02	4.70E-02	1.44E-01	6.61E-02	2.00E-02		7.16E+00		1.87E+01
17	Alewife																								3.02E-03	4.32E-02	5.03E-04	1.78E-01	9.75E-02	7.04E-03	1.27E-01	1.53E-01	3.78E-01	1.03E+00	1.06E-01		8.16E+00		3.03E+01
18	Bloater																								3.00E-04	3.00E-03	1.00E-04	1.10E-02	2.50E-02	2.00E-03	7.00E-03		2.40E-02	2.66E-01	4.00E-02	2.00E-04	1.60E+01	1.40E-02	4.41E+01
19	Rainbow smelt																								9.58E-04	5.75E-03	2.87E-04	2.39E-02	2.78E-02	2.87E-03	1.72E-02	3.26E-02	2.68E-02	2.22E-01	2.30E-02		9.05E-01	1.93E-01	2.16E+00
20	Slimy sculpin																												1.76E-02	9.77E-04					1.37E-02		2.28E-01	2.34E-02	7.23E-01
21	Deepwater sculp																												2.40E-02	2.00E-03					1.90E-02		5.25E+00	3.79E-02	1.49E+01
22	Lake Whitefish																																				7.22E-01	4.80E-02	2.01E+00
23	Yellow perch																																				1.38E-02	1.28E-02	4.24E-02
24	Juv Brown trou																																				3.12E-03		4.16E-03
25	Juv Steelhead																																				3.05E-02		3.15E-02
26	Juv Coho																																				5.95E-04		5.95E-04
27	Juv Chinook																																				9.70E-02		1.58E-01
28	Juv Lake Trout																												1.49E-02								8.06E-02		1.72E-01
29	Burbot																																			1.04E-04	6.23E-03	2.08E-03	1.25E-02
30	Brown trout																																				8.10E-02	5.00E-03	9.40E-02
31	Steelhead																																				8.18E-02	4.99E-03	1.46E-01
32	Coho																																				2.39E-01	7.98E-03	3.26E-01
33	Chinook																																				5.73E-01	1.99E-02	9.88E-01
34	Lake trout																																			2.00E-03	5.30E-02	5.00E-03	1.61E-01
35	Sea lamprey																																				2.31E-03
36	Detritus				9.16E+01	7.55E+01		3.67E+01			5.00E+01	9.80E+00	9.08E+02	2.66E+01		1.61E+02	1.37E+00																					7.58E+03
37	Imports	2.72E+03	2.12E+02	8.31E+03						1.00E-08					1.00E-08
38	Biomasses	1.03E+01	2.18E+00	2.44E+01	4.58E-01	7.56E+00	1.83E+01	7.33E+00	1.35E-01	1.00E-09	3.13E+01	3.93E+00	1.91E+01	2.00E+00		1.61E+00	1.37E+00	1.72E+00	4.40E+00	4.69E-01	7.81E-02	1.98E+00	1.81E-01	2.47E-02	4.16E-03	4.98E-02	5.95E-04	9.90E-02	1.03E-01	7.27E-03	3.60E-02	5.68E-02	4.09E-02	1.15E-01	5.61E-02	4.61E-04	6.97E+01
[truncated: 79 more columns]
